# Supplementary material
Source: publisher figshare collection journal article supplement (https://gsajournals.figshare.com/ndownloader/files/27389039)
Supplement: Supplementary file 1 [file 27389039]

## Sheet: ALL mutations
Isolate	Chromosome	Position	Reference	Alternate	Mutation Type	Amino Acid Change	ORF ID	ORF Description
Chr1x3 (AAB)	Ca21chr1_C_albicans_SC5314	1308081	T	A	synonymous_variant	Val592Val	orf19.1825	Protein of unknown function; mutants are viable; filament induced; regulated by Nrg1, Rfg1, Tup1
Chr1x3 (AAB)	Ca21chr1_C_albicans_SC5314	1694471	T	A	intergenic_region		orf19.4712-orf19.4713
Chr1x3 (AAB)	Ca21chr1_C_albicans_SC5314	1694501	T	C	intergenic_region		orf19.4712-orf19.4713
Chr1x3 (AAB)	Ca21chr1_C_albicans_SC5314	1843469	G	A	synonymous_variant	Lys288Lys	orf19.382	Translation elongation factor 1-alpha; genes encoding ribosomal subunits, translation factors, and tRNA synthetases are downregulated upon phagocytosis by murine macrophage
Chr1x3 (AAB)	Ca21chr1_C_albicans_SC5314	1996210	G	T	intergenic_region		orf19.4769-orf19.4771
Chr1x3 (AAB)	Ca21chr2_C_albicans_SC5314	2154904	A	T	intergenic_region		orf19.3490-orf19.5316
Chr1x3 (AAB)	Ca21chr2_C_albicans_SC5314	2230503	A	G	intergenic_region		orf19.5370-CHR_END
Chr1x3 (AAB)	Ca21chr3_C_albicans_SC5314	1324302	C	T	missense_variant	Thr168Ile	orf19.7370	Possible G-protein coupled receptor; vacuolar membrane transporter for cationic amino acids; PQ-loop motif; rat catheter and Spider biofilm induced
Chr1x3 (AAB)	Ca21chr4_C_albicans_SC5314	531986	G	T	synonymous_variant	Thr552Thr	orf19.2743	Protein of unknown function
Chr1x3 (AAB)	Ca21chr4_C_albicans_SC5314	531987	G	T	missense_variant	Thr552Asn	orf19.2743	Protein of unknown function
Chr1x3 (AAB)	Ca21chr4_C_albicans_SC5314	897645	T	C	synonymous_variant	Gln299Gln	orf19.5290	Protein of unknown function; repressed by Sfu1; Hap43-induced gene
Chr1x3 (AAB)	Ca21chr5_C_albicans_SC5314	647677	C	A	upstream_gene_variant		orf19.4315
Chr1x3 (AAB)	Ca21chr5_C_albicans_SC5314	722443	A	G	intergenic_region		orf19.4349-orf19.2657
Chr1x3 (AAB)	Ca21chr5_C_albicans_SC5314	1182159	A	G	downstream_gene_variant		orf19.4054
Chr1x3 (AAB)	Ca21chr5_C_albicans_SC5314	1186356	A	G	intergenic_region		orf19.4054-orf19.4055
Chr1x3 (AAB)	Ca21chr6_C_albicans_SC5314	501130	G	T	upstream_gene_variant		orf19.3483
Chr1x3 (AAB)	Ca21chr6_C_albicans_SC5314	562329	G	A	synonymous_variant	Ile550Ile	orf19.5543	Protein of unknown function
Chr1x3 (AAB)	Ca21chr6_C_albicans_SC5314	974657	A	T	synonymous_variant	Pro1068Pro	orf19.1097	ALS family protein; role in adhesion, biofilm formation, germ tube induction; expressed at infection of human buccal epithelial cells; putative GPI-anchor; induced by ketoconazole, low iron and at cell wall regeneration; regulated by Sfu1p
Chr1x3 (AAB)	Ca21chr7_C_albicans_SC5314	228232	G	A	intergenic_region		orf19.7006-orf19.6896
Chr1x3 (AAB)	Ca21chr7_C_albicans_SC5314	230575	G	A	downstream_gene_variant		orf19.6896
Chr1x3 (AAB)	Ca21chr7_C_albicans_SC5314	582896	A	G	intergenic_region		orf19.3695-orf19.5191
Chr1x3 (AAB)	Ca21chr7_C_albicans_SC5314	818111	A	G	missense_variant	Thr171Ala	orf19.6703	Protein of unknown function
Chr1x3 (AAB)	Ca21chrR_C_albicans_SC5314	9377	C	A	missense_variant	Asp89Glu	orf19.7544	Member of a family of telomere-proximal genes of unknown function; hypha-induced expression; rat catheter biofilm repressed
Chr1x3 (AAB)	Ca21chrR_C_albicans_SC5314	36171	G	T	intergenic_region		orf19.7522-orf19.7521
Chr1x3 (AAB)	Ca21chrR_C_albicans_SC5314	216542	C	G	downstream_gene_variant		orf19.3261
Chr1x3 (AAB)	Ca21chrR_C_albicans_SC5314	441125	C	T	missense_variant	Glu707Lys	orf19.2602	Oligopeptide transporter; transports 3-to-5-residue peptides; alleles are distinct, one has intron; suppresses S. cerevisiae ptr2-2 mutant defects; induced by BSA or peptides; Stp3p, Hog1p regulated; flow model biofilm induced
Chr1x3 (AAB)	Ca21chrR_C_albicans_SC5314	803036	T	C	synonymous_variant	Ala237Ala	orf19.4380.1	Protein of unknown function
Chr1x3 (AAB)	Ca21chrR_C_albicans_SC5314	1080289	G	A	synonymous_variant	Val173Val	orf19.654	Predicted protein only found in C. albicans and C. dubliniensis; highly induced during chlamydospore development
Chr1x3 (AAB)	Ca21chrR_C_albicans_SC5314	1533894	T	C	synonymous_variant	Glu640Glu	orf19.1816	Cell wall adhesin; epithelial adhesion, endothelial invasion; alleles vary in adhesiveness; immunoprotective in mice; binds SspB adhesin of S. gordonii in mixed biofilm; induced in/required for Spider biofilm; flow model biofilm repressed
Chr1x3 (AAB)	Ca21chrR_C_albicans_SC5314	1557912	A	G	missense_variant	Trp121Arg	orf19.11	Protein of unknown function; transcript regulated by Mig1 and Tup1; rat catheter biofilm induced
Chr1x3 (AAB)	Ca21chrR_C_albicans_SC5314	1561029	C	G	synonymous_variant	Pro322Pro	orf19.733	Protein of unknown function
Chr1x3 (AAB)	Ca21chrR_C_albicans_SC5314	1567454	T	C	synonymous_variant	Cys388Cys	orf19.730	Protein of unknown function
Chr1x3 (AAB)	Ca21chrR_C_albicans_SC5314	1641967	G	A	synonymous_variant	Leu827Leu	orf19.729.1	Putative Rho GTPase activating protein; fungal-specific (no human or murine homolog)
Chr1x3 (AAB)	Ca21chrR_C_albicans_SC5314	2174200	A	G	missense_variant	Asp528Gly	orf19.7592	Predicted acyl CoA synthase
Chr1x3 (ABB)	Ca21chr1_C_albicans_SC5314	774973	T	C	synonymous_variant	Ser291Ser	orf19.1037	Protein of unknown function; rat catheter biofilm repressed
Chr1x3 (ABB)	Ca21chr1_C_albicans_SC5314	1263764	A	G	upstream_gene_variant		orf19.2444
Chr1x3 (ABB)	Ca21chr2_C_albicans_SC5314	763950	T	C	synonymous_variant	Asn150Asn	orf19.857	Protein with a monooxygenase domain; Spider biofilm induced
Chr1x3 (ABB)	Ca21chr2_C_albicans_SC5314	767346	T	A	synonymous_variant	Ala232Ala	orf19.856	Putative thiol-specific monooxygenase; mutant is viable; flow model biofilm induced
Chr1x3 (ABB)	Ca21chr2_C_albicans_SC5314	1669482	C	T	downstream_gene_variant		orf19.2219
Chr1x3 (ABB)	Ca21chr2_C_albicans_SC5314	1827094	G	A	synonymous_variant	Ser356Ser	orf19.207	GPI-anchored adhesin-like protein; filament induced; regulated by Nrg1, Tup1; regulated upon hyphal formation; mRNA binds to She3 and is localized to yeast-form buds and hyphal tips; induced during chlamydospore formation
Chr1x3 (ABB)	Ca21chr2_C_albicans_SC5314	2230503	A	G	intergenic_region		orf19.5370-CHR_END
Chr1x3 (ABB)	Ca21chr2_C_albicans_SC5314	2230522	C	T	intergenic_region		orf19.5370-CHR_END
Chr1x3 (ABB)	Ca21chr3_C_albicans_SC5314	1226	A	T	intergenic_region		CHR_START-orf19.5474
Chr1x3 (ABB)	Ca21chr3_C_albicans_SC5314	666416	A	G	synonymous_variant	Val286Val	orf19.310	Putative mitochondrial protein with a predicted role in cell wall biogenesis; possibly an essential gene, disruptants not obtained by UAU1 method
Chr1x3 (ABB)	Ca21chr3_C_albicans_SC5314	1232694	T	C	synonymous_variant	Arg23Arg	tV(AAC)6	tRNA-Val, predicted by tRNAscan-SE; AAC anticodon
Chr1x3 (ABB)	Ca21chr3_C_albicans_SC5314	1438435	C	A	downstream_gene_variant		orf19.7402
Chr1x3 (ABB)	Ca21chr4_C_albicans_SC5314	850546	C	T	synonymous_variant	Leu96Leu	orf19.1208	Predicted ORF in the Major Repeat Sequence on chromosome 4; member of a family encoded by FGR6-related genes in the RB2 repeat sequence
Chr1x3 (ABB)	Ca21chr4_C_albicans_SC5314	897645	T	C	synonymous_variant	Gln299Gln	orf19.5290	Protein of unknown function; repressed by Sfu1; Hap43-induced gene
Chr1x3 (ABB)	Ca21chr4_C_albicans_SC5314	1297044	T	C	missense_variant	Thr501Ala	orf19.1274	Protein of unknown function
Chr1x3 (ABB)	Ca21chr5_C_albicans_SC5314	655387	T	G	missense_variant	Thr13Pro	orf19.4321	Protein of unknown function
Chr1x3 (ABB)	Ca21chr5_C_albicans_SC5314	1182159	A	G	downstream_gene_variant		orf19.4054
Chr1x3 (ABB)	Ca21chr5_C_albicans_SC5314	1186808	G	C	intergenic_region		orf19.4054-orf19.4055
Chr1x3 (ABB)	Ca21chr6_C_albicans_SC5314	800635	C	T	synonymous_variant	Thr871Thr	orf19.5742	ALS family cell-surface glycoprotein; expressed during infection of human epithelial cells; confers laminin adhesion to S. cerevisiae; highly variable; putative GPI-anchor; Hap43-repressed
Chr1x3 (ABB)	Ca21chr6_C_albicans_SC5314	925168	A	G	upstream_gene_variant		orf19.1075
Chr1x3 (ABB)	Ca21chr7_C_albicans_SC5314	228232	G	A	intergenic_region		orf19.7006-orf19.6896
Chr1x3 (ABB)	Ca21chr7_C_albicans_SC5314	230575	G	A	downstream_gene_variant		orf19.6896
Chr1x3 (ABB)	Ca21chr7_C_albicans_SC5314	582896	A	G	intergenic_region		orf19.3695-orf19.5191
Chr1x3 (ABB)	Ca21chr7_C_albicans_SC5314	589603	C	T	intergenic_region		orf19.5191-orf19.5190
Chr1x3 (ABB)	Ca21chrR_C_albicans_SC5314	216538	A	G	downstream_gene_variant		orf19.3261
Chr1x3 (ABB)	Ca21chrR_C_albicans_SC5314	441125	C	T	missense_variant	Glu707Lys	orf19.2602	Oligopeptide transporter; transports 3-to-5-residue peptides; alleles are distinct, one has intron; suppresses S. cerevisiae ptr2-2 mutant defects; induced by BSA or peptides; Stp3p, Hog1p regulated; flow model biofilm induced
Chr1x3 (ABB)	Ca21chrR_C_albicans_SC5314	1080289	G	A	synonymous_variant	Val173Val	orf19.654	Predicted protein only found in C. albicans and C. dubliniensis; highly induced during chlamydospore development
Chr1x3 (ABB)	Ca21chrR_C_albicans_SC5314	1347792	T	C	intergenic_region		orf19.3888.2-orf19.727
Chr1x3 (ABB)	Ca21chrR_C_albicans_SC5314	1358590	T	G	intergenic_region		orf19.727-orf19.726
Chr1x3 (ABB)	Ca21chrR_C_albicans_SC5314	1557912	A	G	missense_variant	Trp121Arg	orf19.11	Protein of unknown function; transcript regulated by Mig1 and Tup1; rat catheter biofilm induced
Chr1x3 (ABB)	Ca21chrR_C_albicans_SC5314	1561029	C	G	synonymous_variant	Pro322Pro	orf19.733	Protein of unknown function
Chr1x3 (ABB)	Ca21chrR_C_albicans_SC5314	1567454	T	C	synonymous_variant	Cys388Cys	orf19.730	Protein of unknown function
Chr1x3 (ABB)	Ca21chrR_C_albicans_SC5314	1641967	G	A	synonymous_variant	Leu827Leu	orf19.729.1	Putative Rho GTPase activating protein; fungal-specific (no human or murine homolog)
Chr1x3 (ABB)	Ca21chrR_C_albicans_SC5314	1641985	A	C	synonymous_variant	Thr833Thr	orf19.729.1	Putative Rho GTPase activating protein; fungal-specific (no human or murine homolog)
Chr2x3 (AAB)	Ca21chr1_C_albicans_SC5314	892003	G	A	synonymous_variant	Thr128Thr	orf19.1065	HSP70 family chaperone; cell wall fractions; antigenic; beta-defensin peptides impport; ATPase domain binds histatin 5; at hyphal surface, not yeast; farnesol-repressed in biofilm; flow model, Spider biofilm repressed; caspofungin repressed
Chr2x3 (AAB)	Ca21chr1_C_albicans_SC5314	1308081	T	A	synonymous_variant	Val592Val	orf19.1825	Protein of unknown function; mutants are viable; filament induced; regulated by Nrg1, Rfg1, Tup1
Chr2x3 (AAB)	Ca21chr2_C_albicans_SC5314	763950	T	C	synonymous_variant	Asn150Asn	orf19.857	Protein with a monooxygenase domain; Spider biofilm induced
Chr2x3 (AAB)	Ca21chr2_C_albicans_SC5314	1360233	G	T	upstream_gene_variant		orf19.1223
Chr2x3 (AAB)	Ca21chr2_C_albicans_SC5314	1827094	G	A	synonymous_variant	Ser356Ser	orf19.207	GPI-anchored adhesin-like protein; filament induced; regulated by Nrg1, Tup1; regulated upon hyphal formation; mRNA binds to She3 and is localized to yeast-form buds and hyphal tips; induced during chlamydospore formation
Chr2x3 (AAB)	Ca21chr3_C_albicans_SC5314	10474	C	A	intergenic_region		orf19.5469-orf19.5468
Chr2x3 (AAB)	Ca21chr3_C_albicans_SC5314	666416	A	G	synonymous_variant	Val286Val	orf19.310	Putative mitochondrial protein with a predicted role in cell wall biogenesis; possibly an essential gene, disruptants not obtained by UAU1 method
Chr2x3 (AAB)	Ca21chr4_C_albicans_SC5314	531986	G	T	synonymous_variant	Thr552Thr	orf19.2743	Protein of unknown function
Chr2x3 (AAB)	Ca21chr4_C_albicans_SC5314	531987	G	T	missense_variant	Thr552Asn	orf19.2743	Protein of unknown function
Chr2x3 (AAB)	Ca21chr4_C_albicans_SC5314	1297044	T	C	missense_variant	Thr501Ala	orf19.1274	Protein of unknown function
Chr2x3 (AAB)	Ca21chr5_C_albicans_SC5314	655387	T	G	missense_variant	Thr13Pro	orf19.4321	Protein of unknown function
Chr2x3 (AAB)	Ca21chr5_C_albicans_SC5314	724252	G	A	intergenic_region		orf19.4349-orf19.2657
Chr2x3 (AAB)	Ca21chr5_C_albicans_SC5314	1183071	G	C	upstream_gene_variant		orf19.4054
Chr2x3 (AAB)	Ca21chr6_C_albicans_SC5314	562329	G	A	synonymous_variant	Ile550Ile	orf19.5543	Protein of unknown function
Chr2x3 (AAB)	Ca21chr7_C_albicans_SC5314	228232	G	A	intergenic_region		orf19.7006-orf19.6896
Chr2x3 (AAB)	Ca21chr7_C_albicans_SC5314	231648	T	C	synonymous_variant	Leu255Leu	orf19.6896	Predicted ORF overlapping the Major Repeat Sequence on chromosome 7; member of a family encoded by FGR6-related genes in the RB2 repeat sequence
Chr2x3 (AAB)	Ca21chr7_C_albicans_SC5314	589603	C	T	intergenic_region		orf19.5191-orf19.5190
Chr2x3 (AAB)	Ca21chrR_C_albicans_SC5314	803036	T	C	synonymous_variant	Ala237Ala	orf19.4380.1	Protein of unknown function
Chr2x3 (AAB)	Ca21chrR_C_albicans_SC5314	1080289	G	A	synonymous_variant	Val173Val	orf19.654	Predicted protein only found in C. albicans and C. dubliniensis; highly induced during chlamydospore development
Chr2x3 (AAB)	Ca21chrR_C_albicans_SC5314	1348695	G	A	downstream_gene_variant		orf19.727
Chr2x3 (AAB)	Ca21chrR_C_albicans_SC5314	1561029	C	G	synonymous_variant	Pro322Pro	orf19.733	Protein of unknown function
Chr2x3 (ABB)	Ca21chr1_C_albicans_SC5314	854881	G	A	synonymous_variant	Ser288Ser	orf19.4482	Protein of unknown function; constitutive expression independent of MTL or white-opaque status
Chr2x3 (ABB)	Ca21chr2_C_albicans_SC5314	955007	G	A	upstream_gene_variant		orf19.4494
Chr2x3 (ABB)	Ca21chr2_C_albicans_SC5314	2230522	C	T	intergenic_region		orf19.5370-CHR_END
Chr2x3 (ABB)	Ca21chr3_C_albicans_SC5314	1226	A	T	intergenic_region		CHR_START-orf19.5474
Chr2x3 (ABB)	Ca21chr3_C_albicans_SC5314	621994	A	G	missense_variant	Asp43Gly	orf19.279	Protein with a predicted D-Tyr-tRNA(Tyr) deacylase domain; Hap43-repressed gene
Chr2x3 (ABB)	Ca21chr4_C_albicans_SC5314	848692	T	A	intergenic_region		orf19.1207-orf19.1208
Chr2x3 (ABB)	Ca21chr4_C_albicans_SC5314	1195227	T	C	intergenic_region		orf19.1802-orf19.1234
Chr2x3 (ABB)	Ca21chr4_C_albicans_SC5314	1297044	T	C	missense_variant	Thr501Ala	orf19.1274	Protein of unknown function
Chr2x3 (ABB)	Ca21chr5_C_albicans_SC5314	466581	T	C	missense_variant	Asn59Ser	orf19.3160	Heat-shock protein; induced by osmotic/oxidative/cadmium stress, fluphenazine treatment, low iron, CDR1 and CDR2 overexpression, or ssn6 or ssk1 null mutation; overexpression increases resistance to farnesol and azoles
Chr2x3 (ABB)	Ca21chr5_C_albicans_SC5314	554795	A	G	downstream_gene_variant		orf19.4258
Chr2x3 (ABB)	Ca21chr5_C_albicans_SC5314	730436	T	C	intergenic_region		orf19.2657-orf19.2655
Chr2x3 (ABB)	Ca21chr5_C_albicans_SC5314	1183071	G	C	upstream_gene_variant		orf19.4054
Chr2x3 (ABB)	Ca21chr5_C_albicans_SC5314	1185449	C	A	intergenic_region		orf19.4054-orf19.4055
Chr2x3 (ABB)	Ca21chr6_C_albicans_SC5314	562329	G	A	synonymous_variant	Ile550Ile	orf19.5543	Protein of unknown function
Chr2x3 (ABB)	Ca21chr6_C_albicans_SC5314	632377	C	T	synonymous_variant	Phe589Phe	orf19.5584	Peptidase; activity useful for strain identification by multilocus enzyme electrophoresis (MLEE); clade-associated gene expression
Chr2x3 (ABB)	Ca21chr6_C_albicans_SC5314	925168	A	G	upstream_gene_variant		orf19.1075
Chr2x3 (ABB)	Ca21chr7_C_albicans_SC5314	228232	G	A	intergenic_region		orf19.7006-orf19.6896
Chr2x3 (ABB)	Ca21chr7_C_albicans_SC5314	495960	T	A	synonymous_variant	Ala118Ala	orf19.6484	Protein of unknown function
Chr2x3 (ABB)	Ca21chr7_C_albicans_SC5314	587910	A	T	intergenic_region		orf19.5191-orf19.5190
Chr2x3 (ABB)	Ca21chr7_C_albicans_SC5314	818111	A	G	missense_variant	Thr171Ala	orf19.6703	Protein of unknown function
Chr2x3 (ABB)	Ca21chrR_C_albicans_SC5314	441125	C	T	missense_variant	Glu707Lys	orf19.2602	Oligopeptide transporter; transports 3-to-5-residue peptides; alleles are distinct, one has intron; suppresses S. cerevisiae ptr2-2 mutant defects; induced by BSA or peptides; Stp3p, Hog1p regulated; flow model biofilm induced
Chr2x3 (ABB)	Ca21chrR_C_albicans_SC5314	613595	G	T	missense_variant	Pro311Gln	orf19.2826	Protein of unknown function
Chr2x3 (ABB)	Ca21chrR_C_albicans_SC5314	803036	T	C	synonymous_variant	Ala237Ala	orf19.4380.1	Protein of unknown function
Chr2x3 (ABB)	Ca21chrR_C_albicans_SC5314	1080289	G	A	synonymous_variant	Val173Val	orf19.654	Predicted protein only found in C. albicans and C. dubliniensis; highly induced during chlamydospore development
Chr2x3 (ABB)	Ca21chrR_C_albicans_SC5314	1347792	T	C	intergenic_region		orf19.3888.2-orf19.727
Chr2x3 (ABB)	Ca21chrR_C_albicans_SC5314	1347826	A	G	intergenic_region		orf19.3888.2-orf19.727
Chr2x3 (ABB)	Ca21chrR_C_albicans_SC5314	1641967	G	A	synonymous_variant	Leu827Leu	orf19.729.1	Putative Rho GTPase activating protein; fungal-specific (no human or murine homolog)
Chr2x3 (ABB)	Ca21chrR_C_albicans_SC5314	1968435	T	C	downstream_gene_variant		orf19.7323
Chr2x4 (AABB)	Ca21chr1_C_albicans_SC5314	1688298	C	T	intergenic_region		orf19.1233-orf19.4712
Chr2x4 (AABB)	Ca21chr2_C_albicans_SC5314	558255	G	A	synonymous_variant	Gly153Gly	orf19.5826	Predicted amino acid transmembrane transporter; rat catheter biofilm repressed
Chr2x4 (AABB)	Ca21chr2_C_albicans_SC5314	957262	T	A	missense_variant	Asp108Glu	orf19.4492	Protein of unknown function
Chr2x4 (AABB)	Ca21chr2_C_albicans_SC5314	1360233	G	T	upstream_gene_variant		orf19.1223
Chr2x4 (AABB)	Ca21chr2_C_albicans_SC5314	1827094	G	A	synonymous_variant	Ser356Ser	orf19.207	GPI-anchored adhesin-like protein; filament induced; regulated by Nrg1, Tup1; regulated upon hyphal formation; mRNA binds to She3 and is localized to yeast-form buds and hyphal tips; induced during chlamydospore formation
Chr2x4 (AABB)	Ca21chr3_C_albicans_SC5314	621994	A	G	missense_variant	Asp43Gly	orf19.279	Protein with a predicted D-Tyr-tRNA(Tyr) deacylase domain; Hap43-repressed gene
Chr2x4 (AABB)	Ca21chr4_C_albicans_SC5314	1297044	T	C	missense_variant	Thr501Ala	orf19.1274	Protein of unknown function
Chr2x4 (AABB)	Ca21chr5_C_albicans_SC5314	466581	T	C	missense_variant	Asn59Ser	orf19.3160	Heat-shock protein; induced by osmotic/oxidative/cadmium stress, fluphenazine treatment, low iron, CDR1 and CDR2 overexpression, or ssn6 or ssk1 null mutation; overexpression increases resistance to farnesol and azoles
Chr2x4 (AABB)	Ca21chr5_C_albicans_SC5314	647677	C	A	upstream_gene_variant		orf19.4315
Chr2x4 (AABB)	Ca21chr5_C_albicans_SC5314	1183071	G	C	upstream_gene_variant		orf19.4054
Chr2x4 (AABB)	Ca21chr5_C_albicans_SC5314	1186356	A	G	intergenic_region		orf19.4054-orf19.4055
Chr2x4 (AABB)	Ca21chr6_C_albicans_SC5314	562329	G	A	synonymous_variant	Ile550Ile	orf19.5543	Protein of unknown function
Chr2x4 (AABB)	Ca21chr6_C_albicans_SC5314	743454	G	A	upstream_gene_variant		orf19.5714
Chr2x4 (AABB)	Ca21chr6_C_albicans_SC5314	800635	C	T	synonymous_variant	Thr871Thr	orf19.5742	ALS family cell-surface glycoprotein; expressed during infection of human epithelial cells; confers laminin adhesion to S. cerevisiae; highly variable; putative GPI-anchor; Hap43-repressed
Chr2x4 (AABB)	Ca21chr6_C_albicans_SC5314	919287	T	C	missense_variant	Ile70Val	orf19.74	Predicted exocyst component; ortholog of S. cerevisiae Sec5p; merged with orf19.75 in Assembly 21
Chr2x4 (AABB)	Ca21chr7_C_albicans_SC5314	228232	G	A	intergenic_region		orf19.7006-orf19.6896
Chr2x4 (AABB)	Ca21chr7_C_albicans_SC5314	818111	A	G	missense_variant	Thr171Ala	orf19.6703	Protein of unknown function
Chr2x4 (AABB)	Ca21chrR_C_albicans_SC5314	1347792	T	C	intergenic_region		orf19.3888.2-orf19.727
Chr2x4 (AABB)	Ca21chrR_C_albicans_SC5314	1412381	C	A	intergenic_region		orf19.695-snR5d
Chr2x4 (AABB)	Ca21chrR_C_albicans_SC5314	1561029	C	G	synonymous_variant	Pro322Pro	orf19.733	Protein of unknown function
Chr2x4 (AABB)	Ca21chrR_C_albicans_SC5314	1641985	A	C	synonymous_variant	Thr833Thr	orf19.729.1	Putative Rho GTPase activating protein; fungal-specific (no human or murine homolog)
Chr3x3 (AAB)	Ca21chr1_C_albicans_SC5314	207849	T	C	missense_variant	Glu5Gly	orf19.3293	Putative enoyl reductase involved in very long chain fatty acid elongation; possibly an essential gene, disruptants not obtained by UAU1 method
Chr3x3 (AAB)	Ca21chr1_C_albicans_SC5314	811890	A	T	upstream_gene_variant		orf19.4457
Chr3x3 (AAB)	Ca21chr1_C_albicans_SC5314	1036411	A	G	upstream_gene_variant		orf19.51
Chr3x3 (AAB)	Ca21chr2_C_albicans_SC5314	614398	A	C	synonymous_variant	Ile112Ile	orf19.5797	Phosphatidylinositol (PtdIns)-specific phospholipase C (PI-PLC); predicted type 2 membrane protein; role in, and regulated by, filamentation, Nrg1 and Tup1; no mouse systemic virulence role; orf19.5797 and orf19.1586 are almost identical
Chr3x3 (AAB)	Ca21chr2_C_albicans_SC5314	984263	C	T	missense_variant	Asp66Asn	orf19.151	Putative polyamine transporter; mutation confers hypersensitivity to toxic ergosterol analog; hyphal induced; macrophage induced
Chr3x3 (AAB)	Ca21chr2_C_albicans_SC5314	1360233	G	T	upstream_gene_variant		orf19.1223
Chr3x3 (AAB)	Ca21chr2_C_albicans_SC5314	1669482	C	T	downstream_gene_variant		orf19.2219
Chr3x3 (AAB)	Ca21chr2_C_albicans_SC5314	2033865	A	C	intergenic_region		orf19.1358-orf19.1357
Chr3x3 (AAB)	Ca21chr3_C_albicans_SC5314	416920	A	C	upstream_gene_variant		orf19.1658
Chr3x3 (AAB)	Ca21chr3_C_albicans_SC5314	621883	T	C	missense_variant	Ile6Thr	orf19.279	Protein with a predicted D-Tyr-tRNA(Tyr) deacylase domain; Hap43-repressed gene
Chr3x3 (AAB)	Ca21chr3_C_albicans_SC5314	621994	A	G	missense_variant	Asp43Gly	orf19.279	Protein with a predicted D-Tyr-tRNA(Tyr) deacylase domain; Hap43-repressed gene
Chr3x3 (AAB)	Ca21chr4_C_albicans_SC5314	850546	C	T	synonymous_variant	Leu96Leu	orf19.1208	Predicted ORF in the Major Repeat Sequence on chromosome 4; member of a family encoded by FGR6-related genes in the RB2 repeat sequence
Chr3x3 (AAB)	Ca21chr4_C_albicans_SC5314	915287	C	A	missense_variant	Gly15Val	orf19.1420	Protein of unknown function
Chr3x3 (AAB)	Ca21chr4_C_albicans_SC5314	1597373	A	G	synonymous_variant	Phe208Phe	orf19.3074	Member of a family of telomere-proximal genes of unknown function
Chr3x3 (AAB)	Ca21chr5_C_albicans_SC5314	108369	A	C	downstream_gene_variant		orf19.936
Chr3x3 (AAB)	Ca21chr5_C_albicans_SC5314	588266	T	C	missense_variant	Asn154Asp	orf19.4278	Protein of unknown function
Chr3x3 (AAB)	Ca21chr5_C_albicans_SC5314	1182159	A	G	downstream_gene_variant		orf19.4054
Chr3x3 (AAB)	Ca21chr5_C_albicans_SC5314	1183071	G	C	upstream_gene_variant		orf19.4054
Chr3x3 (AAB)	Ca21chr5_C_albicans_SC5314	1186808	G	C	intergenic_region		orf19.4054-orf19.4055
Chr3x3 (AAB)	Ca21chr6_C_albicans_SC5314	562329	G	A	synonymous_variant	Ile550Ile	orf19.5543	Protein of unknown function
Chr3x3 (AAB)	Ca21chr7_C_albicans_SC5314	126392	A	T	upstream_gene_variant		orf19.7052
Chr3x3 (AAB)	Ca21chr7_C_albicans_SC5314	228232	G	A	intergenic_region		orf19.7006-orf19.6896
Chr3x3 (AAB)	Ca21chrR_C_albicans_SC5314	803036	T	C	synonymous_variant	Ala237Ala	orf19.4380.1	Protein of unknown function
Chr3x3 (AAB)	Ca21chrR_C_albicans_SC5314	1561029	C	G	synonymous_variant	Pro322Pro	orf19.733	Protein of unknown function
Chr3x3 (AAB)	Ca21chrR_C_albicans_SC5314	1641967	G	A	synonymous_variant	Leu827Leu	orf19.729.1	Putative Rho GTPase activating protein; fungal-specific (no human or murine homolog)
Chr3x3 (AAB)	Ca21chrR_C_albicans_SC5314	1885117	C	G	intergenic_region		tG(GCC)6-RDN5
Chr3x3 (AAB)	Ca21chrR_C_albicans_SC5314	2014922	T	C	downstream_gene_variant		orf19.7341.1
Chr3x3 (AAB)	Ca21chrR_C_albicans_SC5314	2251163	G	A	upstream_gene_variant		orf19.7644
Chr3x3 (ABB)	Ca19-mtDNA	15795	A	G	missense_variant	Glu342Gly	CaalfMp08.1	Putative endonuclease encoded by the first exon and part of the first intron of the mitochondrial COX1 gene; C-terminus contains a LAGLIDADG domain found in intron-encoded endonucleases; conserved in fungal mitochondria
Chr3x3 (ABB)	Ca21chr2_C_albicans_SC5314	703327	G	T	missense_variant	Leu166Phe	orf19.886	Essential protein involved in endocytosis and polarized growth; ortholog of S. cerevisiae Pan1, which is a part of a complex that regulates actin cytoskeleton; Spider biofilm repressed
Chr3x3 (ABB)	Ca21chr2_C_albicans_SC5314	1360233	G	T	upstream_gene_variant		orf19.1223
Chr3x3 (ABB)	Ca21chr2_C_albicans_SC5314	2230503	A	G	intergenic_region		orf19.5370-CHR_END
Chr3x3 (ABB)	Ca21chr3_C_albicans_SC5314	621883	T	C	missense_variant	Ile6Thr	orf19.279	Protein with a predicted D-Tyr-tRNA(Tyr) deacylase domain; Hap43-repressed gene
Chr3x3 (ABB)	Ca21chr3_C_albicans_SC5314	1548012	A	G	intergenic_region		orf19.6826-orf19.6824
Chr3x3 (ABB)	Ca21chr4_C_albicans_SC5314	806934	T	G	intergenic_region		orf19.1298-orf19.1297
Chr3x3 (ABB)	Ca21chr4_C_albicans_SC5314	806957	C	G	upstream_gene_variant		orf19.1297
Chr3x3 (ABB)	Ca21chr4_C_albicans_SC5314	1189743	A	G	synonymous_variant	Ala26Ala	orf19.1801	Putative cytochrome B5 reductase; plasma membrane-localized
Chr3x3 (ABB)	Ca21chr4_C_albicans_SC5314	1297044	T	C	missense_variant	Thr501Ala	orf19.1274	Protein of unknown function
Chr3x3 (ABB)	Ca21chr5_C_albicans_SC5314	734521	A	C	upstream_gene_variant		orf19.2654
Chr3x3 (ABB)	Ca21chr5_C_albicans_SC5314	948434	A	T	synonymous_variant	Thr488Thr	orf19.3912	GATA transcription factor, involved in regulation of nitrogen starvation-induced filamentous growth; regulates transcription of Mep2 ammonium permease; regulated by Gcn2 and Gcn4; mRNA binds She3; Spider biofilm induced
Chr3x3 (ABB)	Ca21chr5_C_albicans_SC5314	1183071	G	C	upstream_gene_variant		orf19.4054
Chr3x3 (ABB)	Ca21chr6_C_albicans_SC5314	562329	G	A	synonymous_variant	Ile550Ile	orf19.5543	Protein of unknown function
Chr3x3 (ABB)	Ca21chr7_C_albicans_SC5314	228232	G	A	intergenic_region		orf19.7006-orf19.6896
Chr3x3 (ABB)	Ca21chrR_C_albicans_SC5314	9377	C	A	missense_variant	Asp89Glu	orf19.7544	Member of a family of telomere-proximal genes of unknown function; hypha-induced expression; rat catheter biofilm repressed
Chr3x3 (ABB)	Ca21chrR_C_albicans_SC5314	426653	A	G	upstream_gene_variant		orf19.2593
Chr3x3 (ABB)	Ca21chrR_C_albicans_SC5314	802991	A	C	synonymous_variant	Gly252Gly	orf19.4380.1	Protein of unknown function
Chr3x3 (ABB)	Ca21chrR_C_albicans_SC5314	803036	T	C	synonymous_variant	Ala237Ala	orf19.4380.1	Protein of unknown function
Chr3x3 (ABB)	Ca21chrR_C_albicans_SC5314	1641985	A	C	synonymous_variant	Thr833Thr	orf19.729.1	Putative Rho GTPase activating protein; fungal-specific (no human or murine homolog)
Chr4x3 (AAB)	Ca21chr1_C_albicans_SC5314	1688298	C	T	intergenic_region		orf19.1233-orf19.4712
Chr4x3 (AAB)	Ca21chr1_C_albicans_SC5314	1753005	A	G	missense_variant	Lys562Glu	orf19.5074	Protein of unknown function
Chr4x3 (AAB)	Ca21chr2_C_albicans_SC5314	588941	C	T	synonymous_variant	His235His	orf19.5809	Putative arylformamidase, enzyme of the NAD biosynthesis pathway; Gcn4p-regulated
Chr4x3 (AAB)	Ca21chr2_C_albicans_SC5314	1360233	G	T	upstream_gene_variant		orf19.1223
Chr4x3 (AAB)	Ca21chr2_C_albicans_SC5314	1513835	G	A	upstream_gene_variant		orf19.1891
Chr4x3 (AAB)	Ca21chr2_C_albicans_SC5314	2154904	A	T	intergenic_region		orf19.3490-orf19.5316
Chr4x3 (AAB)	Ca21chr3_C_albicans_SC5314	449635	G	A	missense_variant	Pro367Ser	orf19.1639	Protein of unknown function
Chr4x3 (AAB)	Ca21chr3_C_albicans_SC5314	1279946	G	A	downstream_gene_variant		orf19.7350
Chr4x3 (AAB)	Ca21chr4_C_albicans_SC5314	232432	T	C	missense_variant	Phe421Ser	orf19.4675	Essential subunit of the Dam1 (DASH) complex, which acts in chromosome segregation by coupling kinetochores to spindle microtubules
Chr4x3 (AAB)	Ca21chr4_C_albicans_SC5314	848261	G	T	intergenic_region		orf19.1207-orf19.1208
Chr4x3 (AAB)	Ca21chr4_C_albicans_SC5314	848692	T	A	intergenic_region		orf19.1207-orf19.1208
Chr4x3 (AAB)	Ca21chr4_C_albicans_SC5314	850546	C	T	synonymous_variant	Leu96Leu	orf19.1208	Predicted ORF in the Major Repeat Sequence on chromosome 4; member of a family encoded by FGR6-related genes in the RB2 repeat sequence
Chr4x3 (AAB)	Ca21chr4_C_albicans_SC5314	1597463	A	G	synonymous_variant	Asp178Asp	orf19.3074	Member of a family of telomere-proximal genes of unknown function
Chr4x3 (AAB)	Ca21chr5_C_albicans_SC5314	127	A	G	intergenic_region		CHR_START-orf19.5700
Chr4x3 (AAB)	Ca21chr5_C_albicans_SC5314	101147	C	T	intergenic_region		orf19.939-orf19.938
Chr4x3 (AAB)	Ca21chr5_C_albicans_SC5314	466581	T	C	missense_variant	Asn59Ser	orf19.3160	Heat-shock protein; induced by osmotic/oxidative/cadmium stress, fluphenazine treatment, low iron, CDR1 and CDR2 overexpression, or ssn6 or ssk1 null mutation; overexpression increases resistance to farnesol and azoles
Chr4x3 (AAB)	Ca21chr5_C_albicans_SC5314	473709	G	A	missense_variant	Ser59Asn	orf19.4216	Putative heat shock protein; decreased expression in hyphae; transcription is increased in populations of cells exposed to fluconazole over multiple generations; overexpression increases resistance to farnesol and azoles
Chr4x3 (AAB)	Ca21chr5_C_albicans_SC5314	544800	A	G	intergenic_region		orf19.4255-orf19.4257
Chr4x3 (AAB)	Ca21chr5_C_albicans_SC5314	875525	T	C	downstream_gene_variant		orf19.3214
Chr4x3 (AAB)	Ca21chr5_C_albicans_SC5314	1182903	A	G	synonymous_variant	Leu9Leu	orf19.4054	Putative transcription factor; positive regulator of gene expression; Efg1-repressed; member of a family of telomere-proximal genes; transcript upregulated in RHE model of oral candidiasis
Chr4x3 (AAB)	Ca21chr5_C_albicans_SC5314	1186356	A	G	intergenic_region		orf19.4054-orf19.4055
Chr4x3 (AAB)	Ca21chr6_C_albicans_SC5314	562329	G	A	synonymous_variant	Ile550Ile	orf19.5543	Protein of unknown function
Chr4x3 (AAB)	Ca21chr6_C_albicans_SC5314	632320	T	C	synonymous_variant	Asn570Asn	orf19.5584	Peptidase; activity useful for strain identification by multilocus enzyme electrophoresis (MLEE); clade-associated gene expression
Chr4x3 (AAB)	Ca21chr6_C_albicans_SC5314	632377	C	T	synonymous_variant	Phe589Phe	orf19.5584	Peptidase; activity useful for strain identification by multilocus enzyme electrophoresis (MLEE); clade-associated gene expression
Chr4x3 (AAB)	Ca21chr7_C_albicans_SC5314	379336	T	G	missense_variant	Val99Gly	orf19.6547	Protein of unknown function
Chr4x3 (AAB)	Ca21chr7_C_albicans_SC5314	543743	G	A	upstream_gene_variant		orf19.6457
Chr4x3 (AAB)	Ca21chr7_C_albicans_SC5314	586101	G	C	missense_variant	Ala214Pro	orf19.5191	Protein lacking an ortholog in S. cerevisiae; member of a family encoded by FGR6-related genes in the RB2 repeat sequence; transposon mutation affects filamentous growth
Chr4x3 (AAB)	Ca21chr7_C_albicans_SC5314	871245	G	C	missense_variant	Glu253Gln	orf19.7181	Protein of unknown function
Chr4x3 (AAB)	Ca21chrR_C_albicans_SC5314	441125	C	T	missense_variant	Glu707Lys	orf19.2602	Oligopeptide transporter; transports 3-to-5-residue peptides; alleles are distinct, one has intron; suppresses S. cerevisiae ptr2-2 mutant defects; induced by BSA or peptides; Stp3p, Hog1p regulated; flow model biofilm induced
Chr4x3 (AAB)	Ca21chrR_C_albicans_SC5314	1080289	G	A	synonymous_variant	Val173Val	orf19.654	Predicted protein only found in C. albicans and C. dubliniensis; highly induced during chlamydospore development
Chr4x3 (AAB)	Ca21chrR_C_albicans_SC5314	1347792	T	C	intergenic_region		orf19.3888.2-orf19.727
Chr4x3 (AAB)	Ca21chrR_C_albicans_SC5314	1641985	A	C	synonymous_variant	Thr833Thr	orf19.729.1	Putative Rho GTPase activating protein; fungal-specific (no human or murine homolog)
Chr4x3 (ABB)	Ca21chr1_C_albicans_SC5314	804735	A	G	downstream_gene_variant		orf19.1026.1
Chr4x3 (ABB)	Ca21chr1_C_albicans_SC5314	2955542	A	G	upstream_gene_variant		orf19.4980
Chr4x3 (ABB)	Ca21chr2_C_albicans_SC5314	3251	C	A	intergenic_region		CHR_START-orf19.1925
Chr4x3 (ABB)	Ca21chr2_C_albicans_SC5314	614398	A	C	synonymous_variant	Ile112Ile	orf19.5797	Phosphatidylinositol (PtdIns)-specific phospholipase C (PI-PLC); predicted type 2 membrane protein; role in, and regulated by, filamentation, Nrg1 and Tup1; no mouse systemic virulence role; orf19.5797 and orf19.1586 are almost identical
Chr4x3 (ABB)	Ca21chr2_C_albicans_SC5314	768011	C	A	missense_variant	Ala454Glu	orf19.856	Putative thiol-specific monooxygenase; mutant is viable; flow model biofilm induced
Chr4x3 (ABB)	Ca21chr2_C_albicans_SC5314	1158444	T	C	synonymous_variant	Pro444Pro	orf19.6877	Putative peptide:N-glycanase; gene has variable numbers of 12-bp repeats; induced by caspofungin, ciclopirox olamine, ketoconazole or hypoxia; gene of core caspofungin response; Hap43-induced; Spider biofilm induced
Chr4x3 (ABB)	Ca21chr2_C_albicans_SC5314	1826617	T	G	synonymous_variant	Val515Val	orf19.207	GPI-anchored adhesin-like protein; filament induced; regulated by Nrg1, Tup1; regulated upon hyphal formation; mRNA binds to She3 and is localized to yeast-form buds and hyphal tips; induced during chlamydospore formation
Chr4x3 (ABB)	Ca21chr3_C_albicans_SC5314	270453	A	G	synonymous_variant	Ile380Ile	orf19.1725	Putative adhesin-like protein
Chr4x3 (ABB)	Ca21chr3_C_albicans_SC5314	270510	A	G	synonymous_variant	Thr361Thr	orf19.1725	Putative adhesin-like protein
Chr4x3 (ABB)	Ca21chr3_C_albicans_SC5314	621994	A	G	missense_variant	Asp43Gly	orf19.279	Protein with a predicted D-Tyr-tRNA(Tyr) deacylase domain; Hap43-repressed gene
Chr4x3 (ABB)	Ca21chr3_C_albicans_SC5314	765516	G	T	missense_variant	Gly547Val	orf19.360	Putative uracil permease
Chr4x3 (ABB)	Ca21chr3_C_albicans_SC5314	1280933	G	T	missense_variant	Thr662Lys	orf19.7353	Protein of unknown function
Chr4x3 (ABB)	Ca21chr4_C_albicans_SC5314	852297	C	T	intergenic_region		orf19.1208-orf19.5312
Chr4x3 (ABB)	Ca21chr5_C_albicans_SC5314	473709	G	A	missense_variant	Ser59Asn	orf19.4216	Putative heat shock protein; decreased expression in hyphae; transcription is increased in populations of cells exposed to fluconazole over multiple generations; overexpression increases resistance to farnesol and azoles
Chr4x3 (ABB)	Ca21chr5_C_albicans_SC5314	655387	T	G	missense_variant	Thr13Pro	orf19.4321	Protein of unknown function
Chr4x3 (ABB)	Ca21chr5_C_albicans_SC5314	1069967	T	C	synonymous_variant	Pro1251Pro	orf19.3980	Protein of unknown function
Chr4x3 (ABB)	Ca21chr5_C_albicans_SC5314	1182159	A	G	downstream_gene_variant		orf19.4054
Chr4x3 (ABB)	Ca21chr5_C_albicans_SC5314	1183071	G	C	upstream_gene_variant		orf19.4054
Chr4x3 (ABB)	Ca21chr5_C_albicans_SC5314	1184522	C	A	intergenic_region		orf19.4054-orf19.4055
Chr4x3 (ABB)	Ca21chr5_C_albicans_SC5314	1185784	G	A	intergenic_region		orf19.4054-orf19.4055
Chr4x3 (ABB)	Ca21chr6_C_albicans_SC5314	792416	C	T	synonymous_variant	Tyr315Tyr	orf19.5741	Cell-surface adhesin; adhesion, virulence, immunoprotective roles; band at hyphal base; Rfg1, Ssk1, Spider biofilm induced; flow model biofilm repressed; CAI-4 strain background effects; promoter bound Bcr1, Tec1, Efg1, Ndt80, and Brg1
Chr4x3 (ABB)	Ca21chr6_C_albicans_SC5314	925168	A	G	upstream_gene_variant		orf19.1075
Chr4x3 (ABB)	Ca21chr7_C_albicans_SC5314	234667	G	A	intergenic_region		orf19.6896-orf19.6897
Chr4x3 (ABB)	Ca21chr7_C_albicans_SC5314	543743	G	A	upstream_gene_variant		orf19.6457
Chr4x3 (ABB)	Ca21chr7_C_albicans_SC5314	818111	A	G	missense_variant	Thr171Ala	orf19.6703	Protein of unknown function
Chr4x3 (ABB)	Ca21chr7_C_albicans_SC5314	945591	C	T	intergenic_region		orf19.7127-CHR_END
Chr4x3 (ABB)	Ca21chrR_C_albicans_SC5314	441125	C	T	missense_variant	Glu707Lys	orf19.2602	Oligopeptide transporter; transports 3-to-5-residue peptides; alleles are distinct, one has intron; suppresses S. cerevisiae ptr2-2 mutant defects; induced by BSA or peptides; Stp3p, Hog1p regulated; flow model biofilm induced
Chr4x3 (ABB)	Ca21chrR_C_albicans_SC5314	803036	T	C	synonymous_variant	Ala237Ala	orf19.4380.1	Protein of unknown function
Chr4x3 (ABB)	Ca21chrR_C_albicans_SC5314	1080289	G	A	synonymous_variant	Val173Val	orf19.654	Predicted protein only found in C. albicans and C. dubliniensis; highly induced during chlamydospore development
Chr4x3 (ABB)	Ca21chrR_C_albicans_SC5314	1347792	T	C	intergenic_region		orf19.3888.2-orf19.727
Chr4x3 (ABB)	Ca21chrR_C_albicans_SC5314	1561029	C	G	synonymous_variant	Pro322Pro	orf19.733	Protein of unknown function
Chr5x1 (A)	Ca21chr2_C_albicans_SC5314	763950	T	C	synonymous_variant	Asn150Asn	orf19.857	Protein with a monooxygenase domain; Spider biofilm induced
Chr5x1 (A)	Ca21chr2_C_albicans_SC5314	1249941	A	G	downstream_gene_variant		orf19.4107
Chr5x1 (A)	Ca21chr2_C_albicans_SC5314	1284994	C	T	upstream_gene_variant		orf19.5495
Chr5x1 (A)	Ca21chr2_C_albicans_SC5314	2152315	T	C	synonymous_variant	Ala236Ala	orf19.3490	Protein lacking an ortholog in S. cerevisiae; member of a family encoded by FGR6-related genes in the RB2 repeat sequence; transposon mutation affects filamentous growth
Chr5x1 (A)	Ca21chr4_C_albicans_SC5314	531986	G	T	synonymous_variant	Thr552Thr	orf19.2743	Protein of unknown function
Chr5x1 (A)	Ca21chr4_C_albicans_SC5314	531987	G	T	missense_variant	Thr552Asn	orf19.2743	Protein of unknown function
Chr5x1 (A)	Ca21chr4_C_albicans_SC5314	1297044	T	C	missense_variant	Thr501Ala	orf19.1274	Protein of unknown function
Chr5x1 (A)	Ca21chr4_C_albicans_SC5314	1601933	T	A	intergenic_region		orf19.3074-orf19.3073
Chr5x1 (A)	Ca21chr4_C_albicans_SC5314	1601935	A	G	intergenic_region		orf19.3074-orf19.3073
Chr5x1 (A)	Ca21chr5_C_albicans_SC5314	473709	G	A	missense_variant	Ser59Asn	orf19.4216	Putative heat shock protein; decreased expression in hyphae; transcription is increased in populations of cells exposed to fluconazole over multiple generations; overexpression increases resistance to farnesol and azoles
Chr5x1 (A)	Ca21chr5_C_albicans_SC5314	1184522	C	A	intergenic_region		orf19.4054-orf19.4055
Chr5x1 (A)	Ca21chr5_C_albicans_SC5314	1186808	G	C	intergenic_region		orf19.4054-orf19.4055
Chr5x1 (A)	Ca21chr6_C_albicans_SC5314	562329	G	A	synonymous_variant	Ile550Ile	orf19.5543	Protein of unknown function
Chr5x1 (A)	Ca21chr7_C_albicans_SC5314	228232	G	A	intergenic_region		orf19.7006-orf19.6896
Chr5x1 (A)	Ca21chrR_C_albicans_SC5314	441125	C	T	missense_variant	Glu707Lys	orf19.2602	Oligopeptide transporter; transports 3-to-5-residue peptides; alleles are distinct, one has intron; suppresses S. cerevisiae ptr2-2 mutant defects; induced by BSA or peptides; Stp3p, Hog1p regulated; flow model biofilm induced
Chr5x1 (A)	Ca21chrR_C_albicans_SC5314	605657	G	C	intergenic_region		orf19.2823-orf19.2825
Chr5x1 (A)	Ca21chrR_C_albicans_SC5314	802991	A	C	synonymous_variant	Gly252Gly	orf19.4380.1	Protein of unknown function
Chr5x1 (A)	Ca21chrR_C_albicans_SC5314	1347792	T	C	intergenic_region		orf19.3888.2-orf19.727
Chr5x1 (A)	Ca21chrR_C_albicans_SC5314	1348695	G	A	downstream_gene_variant		orf19.727
Chr5x1 (A)	Ca21chrR_C_albicans_SC5314	1641985	A	C	synonymous_variant	Thr833Thr	orf19.729.1	Putative Rho GTPase activating protein; fungal-specific (no human or murine homolog)
Chr5x1 (B)	Ca21chr1_C_albicans_SC5314	824829	C	A	downstream_gene_variant		orf19.4463
Chr5x1 (B)	Ca21chr1_C_albicans_SC5314	1565911	T	C	intergenic_region		orf19.4439-tL(AAG)2
Chr5x1 (B)	Ca21chr2_C_albicans_SC5314	109460	G	A	upstream_gene_variant		orf19.2062
Chr5x1 (B)	Ca21chr2_C_albicans_SC5314	614398	A	C	synonymous_variant	Ile112Ile	orf19.5797	Phosphatidylinositol (PtdIns)-specific phospholipase C (PI-PLC); predicted type 2 membrane protein; role in, and regulated by, filamentation, Nrg1 and Tup1; no mouse systemic virulence role; orf19.5797 and orf19.1586 are almost identical
Chr5x1 (B)	Ca21chr2_C_albicans_SC5314	2152315	T	C	synonymous_variant	Ala236Ala	orf19.3490	Protein lacking an ortholog in S. cerevisiae; member of a family encoded by FGR6-related genes in the RB2 repeat sequence; transposon mutation affects filamentous growth
Chr5x1 (B)	Ca21chr3_C_albicans_SC5314	621994	A	G	missense_variant	Asp43Gly	orf19.279	Protein with a predicted D-Tyr-tRNA(Tyr) deacylase domain; Hap43-repressed gene
Chr5x1 (B)	Ca21chr3_C_albicans_SC5314	666416	A	G	synonymous_variant	Val286Val	orf19.310	Putative mitochondrial protein with a predicted role in cell wall biogenesis; possibly an essential gene, disruptants not obtained by UAU1 method
Chr5x1 (B)	Ca21chr3_C_albicans_SC5314	942793	G	T	upstream_gene_variant		orf19.5904
Chr5x1 (B)	Ca21chr3_C_albicans_SC5314	1232694	T	C	synonymous_variant	Arg23Arg	tV(AAC)6	tRNA-Val, predicted by tRNAscan-SE; AAC anticodon
Chr5x1 (B)	Ca21chr4_C_albicans_SC5314	531986	G	T	synonymous_variant	Thr552Thr	orf19.2743	Protein of unknown function
Chr5x1 (B)	Ca21chr4_C_albicans_SC5314	531987	G	T	missense_variant	Thr552Asn	orf19.2743	Protein of unknown function
Chr5x1 (B)	Ca21chr4_C_albicans_SC5314	850546	C	T	synonymous_variant	Leu96Leu	orf19.1208	Predicted ORF in the Major Repeat Sequence on chromosome 4; member of a family encoded by FGR6-related genes in the RB2 repeat sequence
Chr5x1 (B)	Ca21chr4_C_albicans_SC5314	1297044	T	C	missense_variant	Thr501Ala	orf19.1274	Protein of unknown function
Chr5x1 (B)	Ca21chr5_C_albicans_SC5314	466581	T	C	missense_variant	Asn59Ser	orf19.3160	Heat-shock protein; induced by osmotic/oxidative/cadmium stress, fluphenazine treatment, low iron, CDR1 and CDR2 overexpression, or ssn6 or ssk1 null mutation; overexpression increases resistance to farnesol and azoles
Chr5x1 (B)	Ca21chr5_C_albicans_SC5314	467836	A	G	downstream_gene_variant		orf19.3159.4
Chr5x1 (B)	Ca21chr5_C_albicans_SC5314	722443	A	G	intergenic_region		orf19.4349-orf19.2657
Chr5x1 (B)	Ca21chr5_C_albicans_SC5314	724252	G	A	intergenic_region		orf19.4349-orf19.2657
Chr5x1 (B)	Ca21chr5_C_albicans_SC5314	809558	A	G	missense_variant	Ser51Gly	orf19.6676	Protein of unknown function
Chr5x1 (B)	Ca21chr5_C_albicans_SC5314	1182159	A	G	downstream_gene_variant		orf19.4054
Chr5x1 (B)	Ca21chr5_C_albicans_SC5314	1184522	C	A	intergenic_region		orf19.4054-orf19.4055
Chr5x1 (B)	Ca21chr6_C_albicans_SC5314	1127	A	T	intragenic_variant		orf19.1075.1
Chr5x1 (B)	Ca21chr6_C_albicans_SC5314	562329	G	A	synonymous_variant	Ile550Ile	orf19.5543	Protein of unknown function
Chr5x1 (B)	Ca21chr6_C_albicans_SC5314	1033026	G	C	intragenic_variant		orf19.1075.1
Chr5x1 (B)	Ca21chr7_C_albicans_SC5314	818111	A	G	missense_variant	Thr171Ala	orf19.6703	Protein of unknown function
Chr5x1 (B)	Ca21chrR_C_albicans_SC5314	9377	C	A	missense_variant	Asp89Glu	orf19.7544	Member of a family of telomere-proximal genes of unknown function; hypha-induced expression; rat catheter biofilm repressed
Chr5x1 (B)	Ca21chrR_C_albicans_SC5314	1080289	G	A	synonymous_variant	Val173Val	orf19.654	Predicted protein only found in C. albicans and C. dubliniensis; highly induced during chlamydospore development
Chr5x1 (B)	Ca21chrR_C_albicans_SC5314	1347792	T	C	intergenic_region		orf19.3888.2-orf19.727
Chr5x1 (B)	Ca21chrR_C_albicans_SC5314	1347957	C	T	intergenic_region		orf19.3888.2-orf19.727
Chr5x1 (B)	Ca21chrR_C_albicans_SC5314	1348695	G	A	downstream_gene_variant		orf19.727
Chr5x1 (B)	Ca21chrR_C_albicans_SC5314	1641985	A	C	synonymous_variant	Thr833Thr	orf19.729.1	Putative Rho GTPase activating protein; fungal-specific (no human or murine homolog)
Chr5x3 (AAB)	Ca21chr1_C_albicans_SC5314	1688298	C	T	intergenic_region		orf19.1233-orf19.4712
Chr5x3 (AAB)	Ca21chr1_C_albicans_SC5314	1692646	A	G	missense_variant	Thr425Ala	orf19.4712	Protein lacking an ortholog in S. cerevisiae; member of a family encoded by FGR6-related genes in the RB2 repeat sequence; transposon mutation affects filamentous growth
Chr5x3 (AAB)	Ca21chr2_C_albicans_SC5314	278904	A	C	missense_variant	Asp593Ala	orf19.1462	Putative Mg2+-dependent phosphatidate phosphatase; transcript regulated by Nrg1
Chr5x3 (AAB)	Ca21chr2_C_albicans_SC5314	1360233	G	T	upstream_gene_variant		orf19.1223
Chr5x3 (AAB)	Ca21chr2_C_albicans_SC5314	1827094	G	A	synonymous_variant	Ser356Ser	orf19.207	GPI-anchored adhesin-like protein; filament induced; regulated by Nrg1, Tup1; regulated upon hyphal formation; mRNA binds to She3 and is localized to yeast-form buds and hyphal tips; induced during chlamydospore formation
Chr5x3 (AAB)	Ca21chr5_C_albicans_SC5314	466581	T	C	missense_variant	Asn59Ser	orf19.3160	Heat-shock protein; induced by osmotic/oxidative/cadmium stress, fluphenazine treatment, low iron, CDR1 and CDR2 overexpression, or ssn6 or ssk1 null mutation; overexpression increases resistance to farnesol and azoles
Chr5x3 (AAB)	Ca21chr5_C_albicans_SC5314	1182159	A	G	downstream_gene_variant		orf19.4054
Chr5x3 (AAB)	Ca21chr5_C_albicans_SC5314	1183071	G	C	upstream_gene_variant		orf19.4054
Chr5x3 (AAB)	Ca21chr5_C_albicans_SC5314	1186808	G	C	intergenic_region		orf19.4054-orf19.4055
Chr5x3 (AAB)	Ca21chr6_C_albicans_SC5314	562329	G	A	synonymous_variant	Ile550Ile	orf19.5543	Protein of unknown function
Chr5x3 (AAB)	Ca21chr6_C_albicans_SC5314	979201	A	G	non_coding_transcript_variant		orf19.1075.1
Chr5x3 (AAB)	Ca21chr7_C_albicans_SC5314	228232	G	A	intergenic_region		orf19.7006-orf19.6896
Chr5x3 (AAB)	Ca21chrR_C_albicans_SC5314	441125	C	T	missense_variant	Glu707Lys	orf19.2602	Oligopeptide transporter; transports 3-to-5-residue peptides; alleles are distinct, one has intron; suppresses S. cerevisiae ptr2-2 mutant defects; induced by BSA or peptides; Stp3p, Hog1p regulated; flow model biofilm induced
Chr5x3 (AAB)	Ca21chrR_C_albicans_SC5314	1641967	G	A	synonymous_variant	Leu827Leu	orf19.729.1	Putative Rho GTPase activating protein; fungal-specific (no human or murine homolog)
Chr5x3 (AAB)	Ca21chrR_C_albicans_SC5314	1641985	A	C	synonymous_variant	Thr833Thr	orf19.729.1	Putative Rho GTPase activating protein; fungal-specific (no human or murine homolog)
Chr5x3 (AAB)	Ca21chrR_C_albicans_SC5314	2251163	G	A	upstream_gene_variant		orf19.7644
Chr5x4 (AABB)	Ca21chr1_C_albicans_SC5314	300227	G	A	missense_variant	Ala201Thr	orf19.3337	Protein of unknown function; merged with orf19.3338; rat catheter, flow and Spider model biofilm induced; promoter bound by Bcr1, Efg1, Ndt80, and Rob1; orf19.3338 Bcr1-repressed in RPMI a/a biofilms
Chr5x4 (AABB)	Ca21chr1_C_albicans_SC5314	774973	T	C	synonymous_variant	Ser291Ser	orf19.1037	Protein of unknown function; rat catheter biofilm repressed
Chr5x4 (AABB)	Ca21chr1_C_albicans_SC5314	1308081	T	A	synonymous_variant	Val592Val	orf19.1825	Protein of unknown function; mutants are viable; filament induced; regulated by Nrg1, Rfg1, Tup1
Chr5x4 (AABB)	Ca21chr1_C_albicans_SC5314	1756489	A	T	upstream_gene_variant		orf19.5078
Chr5x4 (AABB)	Ca21chr2_C_albicans_SC5314	500053	T	A	synonymous_variant	Ala218Ala	orf19.1573	Protein of unknown function
Chr5x4 (AABB)	Ca21chr2_C_albicans_SC5314	588941	C	T	synonymous_variant	His235His	orf19.5809	Putative arylformamidase, enzyme of the NAD biosynthesis pathway; Gcn4p-regulated
Chr5x4 (AABB)	Ca21chr2_C_albicans_SC5314	963212	G	T	downstream_gene_variant		snR189b
Chr5x4 (AABB)	Ca21chr3_C_albicans_SC5314	621994	A	G	missense_variant	Asp43Gly	orf19.279	Protein with a predicted D-Tyr-tRNA(Tyr) deacylase domain; Hap43-repressed gene
Chr5x4 (AABB)	Ca21chr3_C_albicans_SC5314	1026629	G	A	stop_gained	Gln1256*	orf19.5947	Putative guanine nucleotide exchange factor (GEF); mutation confers hypersensitivity to Brefeldin A; caspofungin repressed
Chr5x4 (AABB)	Ca21chr4_C_albicans_SC5314	84795	A	G	missense_variant	Lys251Glu	orf19.5678	Protein of unknown function
Chr5x4 (AABB)	Ca21chr5_C_albicans_SC5314	473709	G	A	missense_variant	Ser59Asn	orf19.4216	Putative heat shock protein; decreased expression in hyphae; transcription is increased in populations of cells exposed to fluconazole over multiple generations; overexpression increases resistance to farnesol and azoles
Chr5x4 (AABB)	Ca21chr5_C_albicans_SC5314	1065619	A	C	upstream_gene_variant		orf19.3976
Chr5x4 (AABB)	Ca21chr5_C_albicans_SC5314	1183071	G	C	upstream_gene_variant		orf19.4054
Chr5x4 (AABB)	Ca21chr5_C_albicans_SC5314	1186356	A	G	intergenic_region		orf19.4054-orf19.4055
Chr5x4 (AABB)	Ca21chr6_C_albicans_SC5314	587115	T	C	synonymous_variant	Gln346Gln	orf19.5558	Transcription factor; glutamine-rich activation domain; binds RPG-box DNA sequences; predominantly nuclear; mutation causes accelerated induction of filamentous growth; antigenic during human oral infection; Sko1p-repressed
Chr5x4 (AABB)	Ca21chr6_C_albicans_SC5314	632377	C	T	synonymous_variant	Phe589Phe	orf19.5584	Peptidase; activity useful for strain identification by multilocus enzyme electrophoresis (MLEE); clade-associated gene expression
Chr5x4 (AABB)	Ca21chr6_C_albicans_SC5314	979201	A	G	non_coding_transcript_variant		orf19.1075.1
Chr5x4 (AABB)	Ca21chr6_C_albicans_SC5314	1033026	G	C	intragenic_variant		orf19.1075.1
Chr5x4 (AABB)	Ca21chr6_C_albicans_SC5314	1033031	T	C	intragenic_variant		orf19.1075.1
Chr5x4 (AABB)	Ca21chr7_C_albicans_SC5314	131492	C	T	upstream_gene_variant		orf19.7048.1
Chr5x4 (AABB)	Ca21chr7_C_albicans_SC5314	589603	C	T	intergenic_region		orf19.5191-orf19.5190
Chr5x4 (AABB)	Ca21chrR_C_albicans_SC5314	327223	G	A	missense_variant	Ala26Val	orf19.2520	Protein of unknown function
Chr5x4 (AABB)	Ca21chrR_C_albicans_SC5314	441125	C	T	missense_variant	Glu707Lys	orf19.2602	Oligopeptide transporter; transports 3-to-5-residue peptides; alleles are distinct, one has intron; suppresses S. cerevisiae ptr2-2 mutant defects; induced by BSA or peptides; Stp3p, Hog1p regulated; flow model biofilm induced
Chr5x4 (AABB)	Ca21chrR_C_albicans_SC5314	1068074	A	C	intergenic_region		orf19.1805-orf19.1806
Chr5x4 (AABB)	Ca21chrR_C_albicans_SC5314	1080289	G	A	synonymous_variant	Val173Val	orf19.654	Predicted protein only found in C. albicans and C. dubliniensis; highly induced during chlamydospore development
Chr5x4 (AABB)	Ca21chrR_C_albicans_SC5314	1641985	A	C	synonymous_variant	Thr833Thr	orf19.729.1	Putative Rho GTPase activating protein; fungal-specific (no human or murine homolog)
Chr5x4 (AABB)	Ca21chrR_C_albicans_SC5314	1968435	T	C	downstream_gene_variant		orf19.7323
Chr6x3 (AAB)	Ca21chr2_C_albicans_SC5314	1669482	C	T	downstream_gene_variant		orf19.2219
Chr6x3 (AAB)	Ca21chr3_C_albicans_SC5314	621994	A	G	missense_variant	Asp43Gly	orf19.279	Protein with a predicted D-Tyr-tRNA(Tyr) deacylase domain; Hap43-repressed gene
Chr6x3 (AAB)	Ca21chr4_C_albicans_SC5314	1807	C	A	downstream_gene_variant		orf19.362
Chr6x3 (AAB)	Ca21chr4_C_albicans_SC5314	251789	C	G	downstream_gene_variant		orf19.4664
Chr6x3 (AAB)	Ca21chr4_C_albicans_SC5314	531986	G	T	synonymous_variant	Thr552Thr	orf19.2743	Protein of unknown function
Chr6x3 (AAB)	Ca21chr4_C_albicans_SC5314	531987	G	T	missense_variant	Thr552Asn	orf19.2743	Protein of unknown function
Chr6x3 (AAB)	Ca21chr4_C_albicans_SC5314	858367	A	C	upstream_gene_variant		orf19.5311
Chr6x3 (AAB)	Ca21chr5_C_albicans_SC5314	466581	T	C	missense_variant	Asn59Ser	orf19.3160	Heat-shock protein; induced by osmotic/oxidative/cadmium stress, fluphenazine treatment, low iron, CDR1 and CDR2 overexpression, or ssn6 or ssk1 null mutation; overexpression increases resistance to farnesol and azoles
Chr6x3 (AAB)	Ca21chr5_C_albicans_SC5314	473709	G	A	missense_variant	Ser59Asn	orf19.4216	Putative heat shock protein; decreased expression in hyphae; transcription is increased in populations of cells exposed to fluconazole over multiple generations; overexpression increases resistance to farnesol and azoles
Chr6x3 (AAB)	Ca21chr6_C_albicans_SC5314	562329	G	A	synonymous_variant	Ile550Ile	orf19.5543	Protein of unknown function
Chr6x3 (AAB)	Ca21chr6_C_albicans_SC5314	717987	T	C	upstream_gene_variant		orf19.5630
Chr6x3 (AAB)	Ca21chr6_C_albicans_SC5314	743454	G	A	upstream_gene_variant		orf19.5714
Chr6x3 (AAB)	Ca21chr6_C_albicans_SC5314	977990	A	G	synonymous_variant	Ser2179Ser	orf19.1097	ALS family protein; role in adhesion, biofilm formation, germ tube induction; expressed at infection of human buccal epithelial cells; putative GPI-anchor; induced by ketoconazole, low iron and at cell wall regeneration; regulated by Sfu1p
Chr6x3 (AAB)	Ca21chr6_C_albicans_SC5314	977993	T	C	synonymous_variant	Phe2180Phe	orf19.1097	ALS family protein; role in adhesion, biofilm formation, germ tube induction; expressed at infection of human buccal epithelial cells; putative GPI-anchor; induced by ketoconazole, low iron and at cell wall regeneration; regulated by Sfu1p
Chr6x3 (AAB)	Ca21chr7_C_albicans_SC5314	543743	G	A	upstream_gene_variant		orf19.6457
Chr6x3 (AAB)	Ca21chr7_C_albicans_SC5314	769736	G	A	intergenic_region		orf19.6704-orf19.6705
Chr6x3 (AAB)	Ca21chrR_C_albicans_SC5314	441125	C	T	missense_variant	Glu707Lys	orf19.2602	Oligopeptide transporter; transports 3-to-5-residue peptides; alleles are distinct, one has intron; suppresses S. cerevisiae ptr2-2 mutant defects; induced by BSA or peptides; Stp3p, Hog1p regulated; flow model biofilm induced
Chr6x3 (AAB)	Ca21chrR_C_albicans_SC5314	556604	G	T	upstream_gene_variant		orf19.173
Chr6x3 (AAB)	Ca21chrR_C_albicans_SC5314	803036	T	C	synonymous_variant	Ala237Ala	orf19.4380.1	Protein of unknown function
Chr6x3 (AAB)	Ca21chrR_C_albicans_SC5314	1080289	G	A	synonymous_variant	Val173Val	orf19.654	Predicted protein only found in C. albicans and C. dubliniensis; highly induced during chlamydospore development
Chr6x3 (AAB)	Ca21chrR_C_albicans_SC5314	1561029	C	G	synonymous_variant	Pro322Pro	orf19.733	Protein of unknown function
Chr6x3 (AAB)	Ca21chrR_C_albicans_SC5314	1968435	T	C	downstream_gene_variant		orf19.7323
Chr6x3 (ABB)	Ca21chr2_C_albicans_SC5314	430564	C	A	upstream_gene_variant		orf19.1535
Chr6x3 (ABB)	Ca21chr2_C_albicans_SC5314	614398	A	C	synonymous_variant	Ile112Ile	orf19.5797	Phosphatidylinositol (PtdIns)-specific phospholipase C (PI-PLC); predicted type 2 membrane protein; role in, and regulated by, filamentation, Nrg1 and Tup1; no mouse systemic virulence role; orf19.5797 and orf19.1586 are almost identical
Chr6x3 (ABB)	Ca21chr2_C_albicans_SC5314	1669482	C	T	downstream_gene_variant		orf19.2219
Chr6x3 (ABB)	Ca21chr2_C_albicans_SC5314	1972330	C	T	upstream_gene_variant		orf19.1390
Chr6x3 (ABB)	Ca21chr3_C_albicans_SC5314	530008	G	T	missense_variant	Thr629Lys	orf19.230	Ortholog of S. cerevisiae Pet111; a mitochondrial translational activator specific for the COX2 mRNA; Hap43-induced gene
Chr6x3 (ABB)	Ca21chr3_C_albicans_SC5314	621994	A	G	missense_variant	Asp43Gly	orf19.279	Protein with a predicted D-Tyr-tRNA(Tyr) deacylase domain; Hap43-repressed gene
Chr6x3 (ABB)	Ca21chr3_C_albicans_SC5314	666416	A	G	synonymous_variant	Val286Val	orf19.310	Putative mitochondrial protein with a predicted role in cell wall biogenesis; possibly an essential gene, disruptants not obtained by UAU1 method
Chr6x3 (ABB)	Ca21chr3_C_albicans_SC5314	848171	G	T	intergenic_region		orf19.2803-orf19.918
Chr6x3 (ABB)	Ca21chr3_C_albicans_SC5314	1611461	G	T	downstream_gene_variant		orf19.6798
Chr6x3 (ABB)	Ca21chr3_C_albicans_SC5314	1758949	C	A	intergenic_region		orf19.6715-orf19.6713
Chr6x3 (ABB)	Ca21chr4_C_albicans_SC5314	205376	T	C	synonymous_variant	Leu221Leu	orf19.4686	Protein of unknown function
Chr6x3 (ABB)	Ca21chr4_C_albicans_SC5314	512670	T	C	synonymous_variant	Asn47Asn	orf19.2751	Predicted membrane transporter; member of the monocarboxylate porter (MCP) family, major facilitator superfamily; Hap43-induced gene; alkaline upregulated by Rim101; possibly an essential gene, disruptants not obtained by UAU1 method
Chr6x3 (ABB)	Ca21chr4_C_albicans_SC5314	531986	G	T	synonymous_variant	Thr552Thr	orf19.2743	Protein of unknown function
Chr6x3 (ABB)	Ca21chr4_C_albicans_SC5314	848261	G	T	intergenic_region		orf19.1207-orf19.1208
Chr6x3 (ABB)	Ca21chr4_C_albicans_SC5314	1297044	T	C	missense_variant	Thr501Ala	orf19.1274	Protein of unknown function
Chr6x3 (ABB)	Ca21chr4_C_albicans_SC5314	1542253	G	T	upstream_gene_variant		orf19.3116
Chr6x3 (ABB)	Ca21chr5_C_albicans_SC5314	724230	A	T	intergenic_region		orf19.4349-orf19.2657
Chr6x3 (ABB)	Ca21chr5_C_albicans_SC5314	809558	A	G	missense_variant	Ser51Gly	orf19.6676	Protein of unknown function
Chr6x3 (ABB)	Ca21chr5_C_albicans_SC5314	1183071	G	C	upstream_gene_variant		orf19.4054
Chr6x3 (ABB)	Ca21chr5_C_albicans_SC5314	1184522	C	A	intergenic_region		orf19.4054-orf19.4055
Chr6x3 (ABB)	Ca21chr5_C_albicans_SC5314	1186356	A	G	intergenic_region		orf19.4054-orf19.4055
Chr6x3 (ABB)	Ca21chr6_C_albicans_SC5314	562329	G	A	synonymous_variant	Ile550Ile	orf19.5543	Protein of unknown function
Chr6x3 (ABB)	Ca21chr7_C_albicans_SC5314	284455	G	T	intergenic_region		orf19.6919-orf19.6920
Chr6x3 (ABB)	Ca21chr7_C_albicans_SC5314	767015	C	A	intergenic_region		orf19.6704-orf19.6705
Chr6x3 (ABB)	Ca21chrR_C_albicans_SC5314	75627	C	A	downstream_gene_variant		orf19.7502
Chr6x3 (ABB)	Ca21chrR_C_albicans_SC5314	441125	C	T	missense_variant	Glu707Lys	orf19.2602	Oligopeptide transporter; transports 3-to-5-residue peptides; alleles are distinct, one has intron; suppresses S. cerevisiae ptr2-2 mutant defects; induced by BSA or peptides; Stp3p, Hog1p regulated; flow model biofilm induced
Chr6x3 (ABB)	Ca21chrR_C_albicans_SC5314	803036	T	C	synonymous_variant	Ala237Ala	orf19.4380.1	Protein of unknown function
Chr6x3 (ABB)	Ca21chrR_C_albicans_SC5314	1348695	G	A	downstream_gene_variant		orf19.727
Chr6x3 (ABB)	Ca21chrR_C_albicans_SC5314	1641985	A	C	synonymous_variant	Thr833Thr	orf19.729.1	Putative Rho GTPase activating protein; fungal-specific (no human or murine homolog)
Chr6x3 (ABB)	Ca21chrR_C_albicans_SC5314	1968435	T	C	downstream_gene_variant		orf19.7323
Chr6x3 (ABB)	Ca21chrR_C_albicans_SC5314	2009365	G	T	upstream_gene_variant		tD(GUC)7
Chr7x3 (AAB)	Ca19-mtDNA	15795	A	T	missense_variant	Glu342Val	CaalfMp08.1	Putative endonuclease encoded by the first exon and part of the first intron of the mitochondrial COX1 gene; C-terminus contains a LAGLIDADG domain found in intron-encoded endonucleases; conserved in fungal mitochondria
Chr7x3 (AAB)	Ca21chr2_C_albicans_SC5314	334487	T	C	missense_variant	Thr512Ala	orf19.1491	Protein of unknown function
Chr7x3 (AAB)	Ca21chr2_C_albicans_SC5314	614398	A	C	synonymous_variant	Ile112Ile	orf19.5797	Phosphatidylinositol (PtdIns)-specific phospholipase C (PI-PLC); predicted type 2 membrane protein; role in, and regulated by, filamentation, Nrg1 and Tup1; no mouse systemic virulence role; orf19.5797 and orf19.1586 are almost identical
Chr7x3 (AAB)	Ca21chr2_C_albicans_SC5314	1360233	G	T	upstream_gene_variant		orf19.1223
Chr7x3 (AAB)	Ca21chr3_C_albicans_SC5314	366065	T	C	missense_variant	Val236Ala	orf19.1675	Protein of unknown function
Chr7x3 (AAB)	Ca21chr3_C_albicans_SC5314	522653	G	C	intergenic_region		orf19.1607-orf19.1606
Chr7x3 (AAB)	Ca21chr3_C_albicans_SC5314	920638	C	A	missense_variant	Leu311Ile	orf19.5892	Ortholog of S. cerevisiae Hul4; similar to hect domain E3 ubiquitin-protein ligases; Hap43-repressed gene
Chr7x3 (AAB)	Ca21chr4_C_albicans_SC5314	47732	T	C	synonymous_variant	Gln123Gln	orf19.5657	Protein involved in transcription regulation; ortholog of S. cerevisiae Swi1p, which is a subunit of the SWI/SNF chromatin remodeling complex; interacts with Snf2p; SWI/SNF complex is essential for hyphal growth and virulence
Chr7x3 (AAB)	Ca21chr4_C_albicans_SC5314	897645	T	C	synonymous_variant	Gln299Gln	orf19.5290	Protein of unknown function; repressed by Sfu1; Hap43-induced gene
Chr7x3 (AAB)	Ca21chr5_C_albicans_SC5314	466581	T	C	missense_variant	Asn59Ser	orf19.3160	Heat-shock protein; induced by osmotic/oxidative/cadmium stress, fluphenazine treatment, low iron, CDR1 and CDR2 overexpression, or ssn6 or ssk1 null mutation; overexpression increases resistance to farnesol and azoles
Chr7x3 (AAB)	Ca21chr5_C_albicans_SC5314	809558	A	G	missense_variant	Ser51Gly	orf19.6676	Protein of unknown function
Chr7x3 (AAB)	Ca21chr6_C_albicans_SC5314	460115	G	T	upstream_gene_variant		orf19.3461
Chr7x3 (AAB)	Ca21chr6_C_albicans_SC5314	942882	G	A	synonymous_variant	Gln929Gln	orf19.1084	Protein similar to S. cerevisiae Cdc39p, which is part of the CCR4-NOT transcription regulatory complex; transposon mutation affects filamentous growth
Chr7x3 (AAB)	Ca21chr7_C_albicans_SC5314	818111	A	G	missense_variant	Thr171Ala	orf19.6703	Protein of unknown function
Chr7x3 (AAB)	Ca21chrR_C_albicans_SC5314	803036	T	C	synonymous_variant	Ala237Ala	orf19.4380.1	Protein of unknown function
Chr7x3 (AAB)	Ca21chrR_C_albicans_SC5314	1412381	C	A	intergenic_region		orf19.695-snR5d
Chr7x3 (ABB)	Ca21chr1_C_albicans_SC5314	774973	T	C	synonymous_variant	Ser291Ser	orf19.1037	Protein of unknown function; rat catheter biofilm repressed
Chr7x3 (ABB)	Ca21chr1_C_albicans_SC5314	1694465	T	A	intergenic_region		orf19.4712-orf19.4713
Chr7x3 (ABB)	Ca21chr1_C_albicans_SC5314	1694471	T	A	intergenic_region		orf19.4712-orf19.4713
Chr7x3 (ABB)	Ca21chr1_C_albicans_SC5314	1843469	G	A	synonymous_variant	Lys288Lys	orf19.382	Translation elongation factor 1-alpha; genes encoding ribosomal subunits, translation factors, and tRNA synthetases are downregulated upon phagocytosis by murine macrophage
Chr7x3 (ABB)	Ca21chr2_C_albicans_SC5314	525941	C	T	missense_variant	Ala184Thr	orf19.1586	Putative phosphatidylinositol-specific phospholipase C (PI-PLC); predicted type 2 membrane protein; no S. cerevisiae ortholog; role in, and regulated by, filamentation, Hap43p; almost identical to orf19.5797
Chr7x3 (ABB)	Ca21chr2_C_albicans_SC5314	525945	A	C	synonymous_variant	Ser182Ser	orf19.1586	Putative phosphatidylinositol-specific phospholipase C (PI-PLC); predicted type 2 membrane protein; no S. cerevisiae ortholog; role in, and regulated by, filamentation, Hap43p; almost identical to orf19.5797
Chr7x3 (ABB)	Ca21chr2_C_albicans_SC5314	537566	C	A	upstream_gene_variant		orf19.5840
Chr7x3 (ABB)	Ca21chr2_C_albicans_SC5314	568233	A	T	missense_variant	Ser94Thr	orf19.5821	Protein of unknown function
Chr7x3 (ABB)	Ca21chr2_C_albicans_SC5314	588941	C	T	synonymous_variant	His235His	orf19.5809	Putative arylformamidase, enzyme of the NAD biosynthesis pathway; Gcn4p-regulated
Chr7x3 (ABB)	Ca21chr2_C_albicans_SC5314	1382703	C	A	intergenic_region		orf19.3149-orf19.3148
Chr7x3 (ABB)	Ca21chr2_C_albicans_SC5314	1669482	C	T	downstream_gene_variant		orf19.2219
Chr7x3 (ABB)	Ca21chr2_C_albicans_SC5314	2152315	T	C	synonymous_variant	Ala236Ala	orf19.3490	Protein lacking an ortholog in S. cerevisiae; member of a family encoded by FGR6-related genes in the RB2 repeat sequence; transposon mutation affects filamentous growth
Chr7x3 (ABB)	Ca21chr3_C_albicans_SC5314	1226	A	T	intergenic_region		CHR_START-orf19.5474
Chr7x3 (ABB)	Ca21chr3_C_albicans_SC5314	766113	C	A	missense_variant	Ala65Asp	orf19.6958	Protein of unknown function
Chr7x3 (ABB)	Ca21chr3_C_albicans_SC5314	1797816	C	G	intergenic_region		orf19.6192-CHR_END
Chr7x3 (ABB)	Ca21chr4_C_albicans_SC5314	205376	T	C	synonymous_variant	Leu221Leu	orf19.4686	Protein of unknown function
Chr7x3 (ABB)	Ca21chr4_C_albicans_SC5314	629371	A	G	missense_variant	Glu503Gly	orf19.2690	Putative mitochondrial GTPase; required for mitochondrial morphology and genome maintenance; Spider biofilm induced
Chr7x3 (ABB)	Ca21chr5_C_albicans_SC5314	722443	A	G	intergenic_region		orf19.4349-orf19.2657
Chr7x3 (ABB)	Ca21chr5_C_albicans_SC5314	722556	T	C	intergenic_region		orf19.4349-orf19.2657
Chr7x3 (ABB)	Ca21chr5_C_albicans_SC5314	1183071	G	C	upstream_gene_variant		orf19.4054
Chr7x3 (ABB)	Ca21chr6_C_albicans_SC5314	1127	A	T	intragenic_variant		orf19.1075.1
Chr7x3 (ABB)	Ca21chr6_C_albicans_SC5314	562329	G	A	synonymous_variant	Ile550Ile	orf19.5543	Protein of unknown function
Chr7x3 (ABB)	Ca21chr6_C_albicans_SC5314	978106	C	T	missense_variant	Ala2218Val	orf19.1097	ALS family protein; role in adhesion, biofilm formation, germ tube induction; expressed at infection of human buccal epithelial cells; putative GPI-anchor; induced by ketoconazole, low iron and at cell wall regeneration; regulated by Sfu1p
Chr7x3 (ABB)	Ca21chr7_C_albicans_SC5314	228232	G	A	intergenic_region		orf19.7006-orf19.6896
Chr7x3 (ABB)	Ca21chr7_C_albicans_SC5314	819729	T	G	downstream_gene_variant		orf19.6703
Chr7x3 (ABB)	Ca21chrR_C_albicans_SC5314	441125	C	T	missense_variant	Glu707Lys	orf19.2602	Oligopeptide transporter; transports 3-to-5-residue peptides; alleles are distinct, one has intron; suppresses S. cerevisiae ptr2-2 mutant defects; induced by BSA or peptides; Stp3p, Hog1p regulated; flow model biofilm induced
Chr7x3 (ABB)	Ca21chrR_C_albicans_SC5314	1348695	G	A	downstream_gene_variant		orf19.727
Chr7x3 (ABB)	Ca21chrR_C_albicans_SC5314	1412381	C	A	intergenic_region		orf19.695-snR5d
Chr7x3 (ABB)	Ca21chrR_C_albicans_SC5314	1557898	T	C	synonymous_variant	Gly125Gly	orf19.11	Protein of unknown function; transcript regulated by Mig1 and Tup1; rat catheter biofilm induced
Chr7x3 (ABB)	Ca21chrR_C_albicans_SC5314	1557912	A	G	missense_variant	Trp121Arg	orf19.11	Protein of unknown function; transcript regulated by Mig1 and Tup1; rat catheter biofilm induced
Chr7x3 (ABB)	Ca21chrR_C_albicans_SC5314	1639813	G	A	synonymous_variant	Lys109Lys	orf19.729.1	Putative Rho GTPase activating protein; fungal-specific (no human or murine homolog)
Chr7x3 (ABB)	Ca21chrR_C_albicans_SC5314	1641967	G	A	synonymous_variant	Leu827Leu	orf19.729.1	Putative Rho GTPase activating protein; fungal-specific (no human or murine homolog)
Chr7x3 (ABB)	Ca21chrR_C_albicans_SC5314	1641985	A	C	synonymous_variant	Thr833Thr	orf19.729.1	Putative Rho GTPase activating protein; fungal-specific (no human or murine homolog)
Chr7x3 (ABB)	Ca21chrR_C_albicans_SC5314	1835554	C	A	synonymous_variant	Ile111Ile	orf19.6418	Protein of unknown function
ChrRx3 (AAB)	Ca21chr2_C_albicans_SC5314	588941	C	T	synonymous_variant	His235His	orf19.5809	Putative arylformamidase, enzyme of the NAD biosynthesis pathway; Gcn4p-regulated
ChrRx3 (AAB)	Ca21chr2_C_albicans_SC5314	1360233	G	T	upstream_gene_variant		orf19.1223
ChrRx3 (AAB)	Ca21chr2_C_albicans_SC5314	1774438	G	C	upstream_gene_variant		orf19.3603
ChrRx3 (AAB)	Ca21chr3_C_albicans_SC5314	162691	T	C	upstream_gene_variant		orf19.1289
ChrRx3 (AAB)	Ca21chr3_C_albicans_SC5314	666416	A	G	synonymous_variant	Val286Val	orf19.310	Putative mitochondrial protein with a predicted role in cell wall biogenesis; possibly an essential gene, disruptants not obtained by UAU1 method
ChrRx3 (AAB)	Ca21chr3_C_albicans_SC5314	1051908	C	T	missense_variant	Pro1305Ser	orf19.5958	Multidrug transporter, ATP-binding cassette (ABC) superfamily; transports phospholipids, in-to-out direction; overexpressed in azole-resistant isolates; repressed in young biofilms
ChrRx3 (AAB)	Ca21chr4_C_albicans_SC5314	531986	G	T	synonymous_variant	Thr552Thr	orf19.2743	Protein of unknown function
ChrRx3 (AAB)	Ca21chr4_C_albicans_SC5314	531987	G	T	missense_variant	Thr552Asn	orf19.2743	Protein of unknown function
ChrRx3 (AAB)	Ca21chr4_C_albicans_SC5314	1597463	A	G	synonymous_variant	Asp178Asp	orf19.3074	Member of a family of telomere-proximal genes of unknown function
ChrRx3 (AAB)	Ca21chr5_C_albicans_SC5314	467836	A	G	downstream_gene_variant		orf19.3159.4
ChrRx3 (AAB)	Ca21chr5_C_albicans_SC5314	473709	G	A	missense_variant	Ser59Asn	orf19.4216	Putative heat shock protein; decreased expression in hyphae; transcription is increased in populations of cells exposed to fluconazole over multiple generations; overexpression increases resistance to farnesol and azoles
ChrRx3 (AAB)	Ca21chr5_C_albicans_SC5314	528671	G	T	intergenic_region		orf19.4245-orf19.4246
ChrRx3 (AAB)	Ca21chr5_C_albicans_SC5314	1184522	C	A	intergenic_region		orf19.4054-orf19.4055
ChrRx3 (AAB)	Ca21chr6_C_albicans_SC5314	298946	C	T	missense_variant	Arg765Lys	orf19.3434	Zn(II)2Cys6 transcription factor; regulator of yeast form adherence; required for yeast cell adherence to silicone substrate
ChrRx3 (AAB)	Ca21chr7_C_albicans_SC5314	228232	G	A	intergenic_region		orf19.7006-orf19.6896
ChrRx3 (AAB)	Ca21chr7_C_albicans_SC5314	588495	A	G	intergenic_region		orf19.5191-orf19.5190
ChrRx3 (AAB)	Ca21chrR_C_albicans_SC5314	801398	G	A	synonymous_variant	Asp783Asp	orf19.4380.1	Protein of unknown function
ChrRx3 (AAB)	Ca21chrR_C_albicans_SC5314	803036	T	C	synonymous_variant	Ala237Ala	orf19.4380.1	Protein of unknown function
ChrRx3 (AAB)	Ca21chrR_C_albicans_SC5314	1080289	G	A	synonymous_variant	Val173Val	orf19.654	Predicted protein only found in C. albicans and C. dubliniensis; highly induced during chlamydospore development
ChrRx3 (AAB)	Ca21chrR_C_albicans_SC5314	1412381	C	A	intergenic_region		orf19.695-snR5d
ChrRx3 (AAB)	Ca21chrR_C_albicans_SC5314	1567454	T	C	synonymous_variant	Cys388Cys	orf19.730	Protein of unknown function
ChrRx3 (AAB)	Ca21chrR_C_albicans_SC5314	2061471	A	T	upstream_gene_variant		orf19.6594
ChrRx3 (ABB)	Ca21chr2_C_albicans_SC5314	588941	C	T	synonymous_variant	His235His	orf19.5809	Putative arylformamidase, enzyme of the NAD biosynthesis pathway; Gcn4p-regulated
ChrRx3 (ABB)	Ca21chr2_C_albicans_SC5314	1360233	G	T	upstream_gene_variant		orf19.1223
ChrRx3 (ABB)	Ca21chr3_C_albicans_SC5314	1116	T	G	intergenic_region		CHR_START-orf19.5474
ChrRx3 (ABB)	Ca21chr3_C_albicans_SC5314	202222	A	T	synonymous_variant	Thr128Thr	orf19.2503	Protein of unknown function
ChrRx3 (ABB)	Ca21chr3_C_albicans_SC5314	621994	A	G	missense_variant	Asp43Gly	orf19.279	Protein with a predicted D-Tyr-tRNA(Tyr) deacylase domain; Hap43-repressed gene
ChrRx3 (ABB)	Ca21chr3_C_albicans_SC5314	762090	T	C	missense_variant	Val168Ala	orf19.357	Protein of unknown function
ChrRx3 (ABB)	Ca21chr4_C_albicans_SC5314	531986	G	T	synonymous_variant	Thr552Thr	orf19.2743	Protein of unknown function
ChrRx3 (ABB)	Ca21chr4_C_albicans_SC5314	1117330	G	A	downstream_gene_variant		orf19.745
ChrRx3 (ABB)	Ca21chr5_C_albicans_SC5314	466581	T	C	missense_variant	Asn59Ser	orf19.3160	Heat-shock protein; induced by osmotic/oxidative/cadmium stress, fluphenazine treatment, low iron, CDR1 and CDR2 overexpression, or ssn6 or ssk1 null mutation; overexpression increases resistance to farnesol and azoles
ChrRx3 (ABB)	Ca21chr5_C_albicans_SC5314	473709	G	A	missense_variant	Ser59Asn	orf19.4216	Putative heat shock protein; decreased expression in hyphae; transcription is increased in populations of cells exposed to fluconazole over multiple generations; overexpression increases resistance to farnesol and azoles
ChrRx3 (ABB)	Ca21chr5_C_albicans_SC5314	809558	A	G	missense_variant	Ser51Gly	orf19.6676	Protein of unknown function
SC5314	Ca21chr1_C_albicans_SC5314	1688298	C	T	intergenic_region		orf19.1233-orf19.4712
SC5314	Ca21chr2_C_albicans_SC5314	525941	C	T	missense_variant	p.Ala184Thr	orf19.1586	Putative phosphatidylinositol-specific phospholipase C (PI-PLC); predicted type 2 membrane protein; no S. cerevisiae ortholog; role in, and regulated by, filamentation, Hap43p; almost identical to orf19.5797
SC5314	Ca21chr2_C_albicans_SC5314	614398	A	C	synonymous_variant	p.Ile112Ile	orf19.5797	Phosphatidylinositol (PtdIns)-specific phospholipase C (PI-PLC); predicted type 2 membrane protein; role in, and regulated by, filamentation, Nrg1 and Tup1; no mouse systemic virulence role; orf19.5797 and orf19.1586 are almost identical
SC5314	Ca21chr2_C_albicans_SC5314	1360233	G	T	upstream_gene_variant		orf19.1223
SC5314	Ca21chr2_C_albicans_SC5314	1669482	C	T	downstream_gene_variant		orf19.2219
SC5314	Ca21chr2_C_albicans_SC5314	2152315	T	C	synonymous_variant	p.Ala236Ala	orf19.3490	Protein lacking an ortholog in S. cerevisiae; member of a family encoded by FGR6-related genes in the RB2 repeat sequence; transposon mutation affects filamentous growth
SC5314	Ca21chr2_C_albicans_SC5314	2230522	C	T	intergenic_region		orf19.5370-CHR_END
SC5314	Ca21chr3_C_albicans_SC5314	10289	T	G	intergenic_region		orf19.5469-orf19.5468
SC5314	Ca21chr3_C_albicans_SC5314	621994	A	G	missense_variant	p.Asp43Gly	orf19.279	Protein with a predicted D-Tyr-tRNA(Tyr) deacylase domain; Hap43-repressed gene
SC5314	Ca21chr4_C_albicans_SC5314	850546	C	T	synonymous_variant	p.Leu96Leu	orf19.1208	Predicted ORF in the Major Repeat Sequence on chromosome 4; member of a family encoded by FGR6-related genes in the RB2 repeat sequence
SC5314	Ca21chr5_C_albicans_SC5314	466786	T	A	upstream_gene_variant		orf19.3160
SC5314	Ca21chr5_C_albicans_SC5314	467836	A	G	downstream_gene_variant		orf19.3159.4
SC5314	Ca21chr5_C_albicans_SC5314	750228	T	A	upstream_gene_variant		orf19.2649
SC5314	Ca21chr5_C_albicans_SC5314	1183071	G	C	upstream_gene_variant		orf19.4054
SC5314	Ca21chr5_C_albicans_SC5314	1186356	A	G	intergenic_region		orf19.4054-orf19.4055
SC5314	Ca21chr5_C_albicans_SC5314	1186808	G	C	intergenic_region		orf19.4054-orf19.4055
SC5314	Ca21chr6_C_albicans_SC5314	562329	G	A	synonymous_variant	p.Ile550Ile	orf19.5543	Protein of unknown function
SC5314	Ca21chr6_C_albicans_SC5314	632377	C	T	synonymous_variant	p.Phe589Phe	orf19.5584	Peptidase; activity useful for strain identification by multilocus enzyme electrophoresis (MLEE); clade-associated gene expression
SC5314	Ca21chr7_C_albicans_SC5314	228232	G	A	intergenic_region		orf19.7006-orf19.6896
SC5314	Ca21chr7_C_albicans_SC5314	231543	T	C	synonymous_variant	p.Gly290Gly	orf19.6896	Predicted ORF overlapping the Major Repeat Sequence on chromosome 7; member of a family encoded by FGR6-related genes in the RB2 repeat sequence
SC5314	Ca21chr7_C_albicans_SC5314	577443	G	A	intergenic_region		orf19.3695-orf19.5191
SC5314	Ca21chr7_C_albicans_SC5314	943615	C	T	upstream_gene_variant		orf19.7127
SC5314	Ca21chr7_C_albicans_SC5314	945358	C	T	intergenic_region		orf19.7127-CHR_END
SC5314	Ca21chrR_C_albicans_SC5314	441125	C	T	missense_variant	p.Glu707Lys	orf19.2602	Oligopeptide transporter; transports 3-to-5-residue peptides; alleles are distinct, one has intron; suppresses S. cerevisiae ptr2-2 mutant defects; induced by BSA or peptides; Stp3p, Hog1p regulated; flow model biofilm induced
SC5314	Ca21chrR_C_albicans_SC5314	802991	A	C	synonymous_variant	p.Gly252Gly	orf19.4380.1	Protein of unknown function
SC5314	Ca21chrR_C_albicans_SC5314	1561029	C	G	synonymous_variant	p.Pro322Pro	orf19.733	Protein of unknown function
SC5314	Ca21chrR_C_albicans_SC5314	1641985	A	C	synonymous_variant	p.Thr833Thr	orf19.729.1	Putative Rho GTPase activating protein; fungal-specific (no human or murine homolog)

## Sheet: nonsense
Isolate	Chromosome	Position	Reference	Alternate	Mutation Type	Amino Acid Change	ORF ID	ORF Description
Chr5x4 (AABB)	Ca21chr3_C_albicans_SC5314	1026629	G	A	stop_gained	Gln1256*	orf19.5947	Putative guanine nucleotide exchange factor (GEF); mutation confers hypersensitivity to Brefeldin A; caspofungin repressed

## Sheet: non-coding transcript
Isolate	Chromosome	Position	Reference	Alternate	Mutation Type	Amino Acid Change	ORF ID	ORF Description
Chr5x3 (AAB); Chr5x4 (AABB)	Ca21chr6_C_albicans_SC5314	979201	A	G	non_coding_transcript_variant		orf19.1075.1

## Sheet: missense
Isolate	Amino Acid Change	ORF ID	ORF Description
Chr7x3 (ABB)	Ala2218Val	orf19.1097	ALS family protein; role in adhesion, biofilm formation, germ tube induction; expressed at infection of human buccal epithelial cells; putative GPI-anchor; induced by ketoconazole, low iron and at cell wall regeneration; regulated by Sfu1p
Chr3x3 (ABB)	Leu166Phe	orf19.886	Essential protein involved in endocytosis and polarized growth; ortholog of S. cerevisiae Pan1, which is a part of a complex that regulates actin cytoskeleton; Spider biofilm repressed
Chr4x3 (AAB)	Phe421Ser	orf19.4675	Essential subunit of the Dam1 (DASH) complex, which acts in chromosome segregation by coupling kinetochores to spindle microtubules
Chr2x3 (ABB); Chr2x4 (AABB); Chr4x3 (AAB); Chr5x1 (B); Chr5x3 (AAB); Chr6x3 (AAB);Chr7x3 (AAB)	Asn59Ser	orf19.3160	Heat-shock protein; induced by osmotic/oxidative/cadmium stress, fluphenazine treatment, low iron, CDR1 and CDR2 overexpression, or ssn6 or ssk1 null mutation; overexpression increases resistance to farnesol and azoles
Chr1x3 (AAB); Chr3x3 (ABB); Chr5x1 (B)	Asp89Glu	orf19.7544	Member of a family of telomere-proximal genes of unknown function; hypha-induced expression; rat catheter biofilm repressed
ChrRx3 (AAB)	Pro1305Ser	orf19.5958	Multidrug transporter, ATP-binding cassette (ABC) superfamily; transports phospholipids, in-to-out direction; overexpressed in azole-resistant isolates; repressed in young biofilms
Chr7x3 (AAB)	Leu311Ile	orf19.5892	Ortholog of S. cerevisiae Hul4; similar to hect domain E3 ubiquitin-protein ligases; Hap43-repressed gene
Chr6x3 (ABB)	Thr629Lys	orf19.230	Ortholog of S. cerevisiae Pet111; a mitochondrial translational activator specific for the COX2 mRNA; Hap43-induced gene
Chr1x3 (AAB)	Thr168Ile	orf19.7370	Possible G-protein coupled receptor; vacuolar membrane transporter for cationic amino acids; PQ-loop motif; rat catheter and Spider biofilm induced
Chr1x3 (AAB)	Asp528Gly	orf19.7592	Predicted acyl CoA synthase
Chr2x4 (AABB)	Ile70Val	orf19.74	Predicted exocyst component; ortholog of S. cerevisiae Sec5p; merged with orf19.75 in Assembly 21
Chr5x3 (AAB)	Thr425Ala	orf19.4712	Protein lacking an ortholog in S. cerevisiae; member of a family encoded by FGR6-related genes in the RB2 repeat sequence; transposon mutation affects filamentous growth
Chr4x3 (AAB)	Ala214Pro	orf19.5191	Protein lacking an ortholog in S. cerevisiae; member of a family encoded by FGR6-related genes in the RB2 repeat sequence; transposon mutation affects filamentous growth
Chr1x3 (ABB); Chr2x3 (AAB); Chr2x3 (ABB); Chr2x4 (AABB); Chr3x3 (ABB); Chr5x1 (A); Chr5x1 (B); Chr6x3 (ABB)	Thr501Ala	orf19.1274	Protein of unknown function
Chr3x3 (AAB)	Gly15Val	orf19.1420	Protein of unknown function
Chr7x3 (AAB)	Thr512Ala	orf19.1491	Protein of unknown function
Chr4x3 (AAB)	Pro367Ser	orf19.1639	Protein of unknown function
Chr7x3 (AAB)	Val236Ala	orf19.1675	Protein of unknown function
Chr5x4 (AABB)	Ala26Val	orf19.2520	Protein of unknown function
Chr1x3 (AAB); Chr2x3 (AAB); Chr5x1 (A); Chr5x1 (B); Ch6x3 (AAB); ChrRx3 (AAB)	Thr552Asn	orf19.2743	Protein of unknown function
Chr2x3 (ABB)	Pro311Gln	orf19.2826	Protein of unknown function
ChrRx3 (ABB)	Val168Ala	orf19.357	Protein of unknown function
Chr3x3 (AAB)	Asn154Asp	orf19.4278	Protein of unknown function
Chr1x3 (ABB); Chr2x3 (AAB); Chr4x3 (ABB)	Thr13Pro	orf19.4321	Protein of unknown function
Chr2x4 (AABB)	Asp108Glu	orf19.4492	Protein of unknown function
Chr4x3 (AAB)	Lys562Glu	orf19.5074	Protein of unknown function
Chr5x4 (AABB)	Lys251Glu	orf19.5678	Protein of unknown function
Chr7x3 (ABB)	Ser94Thr	orf19.5821	Protein of unknown function
Chr4x3 (AAB)	Val99Gly	orf19.6547	Protein of unknown function
Chr5x1 (B); Chr6x3 (ABB); Chr7x3 (AAB); ChrRx3 (ABB)	Ser51Gly	orf19.6676	Protein of unknown function
Chr1x3 (AAB); Chr2x3 (ABB); Chr2x4 (AABB); Chr4x3 (ABB); Chr5x1 (B); Chr7x3 (AAB)	Thr171Ala	orf19.6703	Protein of unknown function
Chr7x3 (ABB)	Ala65Asp	orf19.6958	Protein of unknown function
Chr4x3 (AAB)	Glu253Gln	orf19.7181	Protein of unknown function
Chr4x3 (ABB)	Thr662Lys	orf19.7353	Protein of unknown function
Chr5x4 (AABB)	Ala201Thr	orf19.3337	Protein of unknown function; merged with orf19.3338; rat catheter, flow and Spider model biofilm induced; promoter bound by Bcr1, Efg1, Ndt80, and Rob1; orf19.3338 Bcr1-repressed in RPMI a/a biofilms
Chr1x3 (ABB); Chr1x3 (ABB); Chr7x3 (ABB)	Trp121Arg	orf19.11	Protein of unknown function; transcript regulated by Mig1 and Tup1; rat catheter biofilm induced
Chr7x3 (AAB); Chr7x3 (ABB)	Glu342Val	CaalfMp08.1	Putative endonuclease encoded by the first exon and part of the first intron of the mitochondrial COX1 gene; C-terminus contains a LAGLIDADG domain found in intron-encoded endonucleases; conserved in fungal mitochondria
Chr3x3 (AAB)	Glu5Gly	orf19.3293	Putative enoyl reductase involved in very long chain fatty acid elongation; possibly an essential gene, disruptants not obtained by UAU1 method
Chr4x3 (AAB); Chr4x3 (ABB); Chr5x1 (A); Chr5x4 (AABB); Chr6x3 (AAB); ChrRx3 (AAB); ChrRx3 (ABB)	Ser59Asn	orf19.4216	Putative heat shock protein; decreased expression in hyphae; transcription is increased in populations of cells exposed to fluconazole over multiple generations; overexpression increases resistance to farnesol and azoles
Chr5x3 (AAB)	Asp593Ala	orf19.1462	Putative Mg2+-dependent phosphatidate phosphatase; transcript regulated by Nrg1
Chr7x3 (ABB)	Glu503Gly	orf19.2690	Putative mitochondrial GTPase; required for mitochondrial morphology and genome maintenance; Spider biofilm induced
Chr3x3 (AAB)	Asp66Asn	orf19.151	Putative polyamine transporter; mutation confers hypersensitivity to toxic ergosterol analog; hyphal induced; macrophage induced
Chr4x3 (ABB)	Ala454Glu	orf19.856	Putative thiol-specific monooxygenase; mutant is viable; flow model biofilm induced
Chr4x3 (ABB)	Gly547Val	orf19.360	Putative uracil permease
ChrRx3 (AAB)	Arg765Lys	orf19.3434	Zn(II)2Cys6 transcription factor; regulator of yeast form adherence; required for yeast cell adherence to silicone substrate

## Sheet: synonymous
Isolate	ORF ID	Chromosome	Position	Reference	Alternate	Mutation Type	Amino Acid Change	ORF ID2	ORF Description
Chr1x3 (ABB); Chr5x4 (AABB); Chr7x3 (ABB)	orf19.1037	Ca21chr1_C_albicans_SC5314	774973	T	C	synonymous_variant	Ser291Ser	orf19.1037	Protein of unknown function; rat catheter biofilm repressed
Chr2x3 (AAB)	orf19.1065	Ca21chr1_C_albicans_SC5314	892003	G	A	synonymous_variant	Thr128Thr	orf19.1065	HSP70 family chaperone; cell wall fractions; antigenic; beta-defensin peptides impport; ATPase domain binds histatin 5; at hyphal surface, not yeast; farnesol-repressed in biofilm; flow model, Spider biofilm repressed; caspofungin repressed
Chr7x3 (AAB)	orf19.1084	Ca21chr6_C_albicans_SC5314	942882	G	A	synonymous_variant	Gln929Gln	orf19.1084	Protein similar to S. cerevisiae Cdc39p, which is part of the CCR4-NOT transcription regulatory complex; transposon mutation affects filamentous growth
Chr1x3 (AAB); Chr6x3 (AAB); Chr6x3 (ABB)	orf19.1097	Ca21chr6_C_albicans_SC5314	974657	A	T	synonymous_variant	Pro1068Pro	orf19.1097	ALS family protein; role in adhesion, biofilm formation, germ tube induction; expressed at infection of human buccal epithelial cells; putative GPI-anchor; induced by ketoconazole, low iron and at cell wall regeneration; regulated by Sfu1p
Chr7x3 (ABB)	orf19.11	Ca21chrR_C_albicans_SC5314	1557898	T	C	synonymous_variant	Gly125Gly	orf19.11	Protein of unknown function; transcript regulated by Mig1 and Tup1; rat catheter biofilm induced
Chr5x4 (AABB)	orf19.1573	Ca21chr2_C_albicans_SC5314	500053	T	A	synonymous_variant	Ala218Ala	orf19.1573	Protein of unknown function
Chr7x3 (ABB)	orf19.1586	Ca21chr2_C_albicans_SC5314	525945	A	C	synonymous_variant	Ser182Ser	orf19.1586	Putative phosphatidylinositol-specific phospholipase C (PI-PLC); predicted type 2 membrane protein; no S. cerevisiae ortholog; role in, and regulated by, filamentation, Hap43p; almost identical to orf19.5797
Chr4x3 (AAB); Chr4x3 (ABB)	orf19.1725	Ca21chr3_C_albicans_SC5314	270453	A	G	synonymous_variant	Ile380Ile	orf19.1725	Putative adhesin-like protein
Chr3x3 (ABB)	orf19.1801	Ca21chr4_C_albicans_SC5314	1189743	A	G	synonymous_variant	Ala26Ala	orf19.1801	Putative cytochrome B5 reductase; plasma membrane-localized
Chr1x3 (AAB)	orf19.1816	Ca21chrR_C_albicans_SC5314	1533894	T	C	synonymous_variant	Glu640Glu	orf19.1816	Cell wall adhesin; epithelial adhesion, endothelial invasion; alleles vary in adhesiveness; immunoprotective in mice; binds SspB adhesin of S. gordonii in mixed biofilm; induced in/required for Spider biofilm; flow model biofilm repressed
Chr1x3 (AAB); Chr2x3 (AAB); Chr5x4 (AABB)	orf19.1825	Ca21chr1_C_albicans_SC5314	1308081	T	A	synonymous_variant	Val592Val	orf19.1825	Protein of unknown function; mutants are viable; filament induced; regulated by Nrg1, Rfg1, Tup1
Chr1x3 (ABB); Chr2x3 (AAB); Chr2x4 (AABB); Chr4x3 (ABB); Chr5x3 (AAB)	orf19.207	Ca21chr2_C_albicans_SC5314	1827094	G	A	synonymous_variant	Ser356Ser	orf19.207	GPI-anchored adhesin-like protein; filament induced; regulated by Nrg1, Tup1; regulated upon hyphal formation; mRNA binds to She3 and is localized to yeast-form buds and hyphal tips; induced during chlamydospore formation
ChrRx3 (ABB)	orf19.2503	Ca21chr3_C_albicans_SC5314	202222	A	T	synonymous_variant	Thr128Thr	orf19.2503	Protein of unknown function
Chr1x3 (AAB); Chr2x3 (AAB); Chr5x1 (A); Chr5x1 (B); Chr6x3 (AAB); Chr6x3 (ABB); ChrRx3 (AAB); ChrRx3 (ABB)	orf19.2743	Ca21chr4_C_albicans_SC5314	531986	G	T	synonymous_variant	Thr552Thr	orf19.2743	Protein of unknown function
Chr6x3 (ABB)	orf19.2751	Ca21chr4_C_albicans_SC5314	512670	T	C	synonymous_variant	Asn47Asn	orf19.2751	Predicted membrane transporter; member of the monocarboxylate porter (MCP) family, major facilitator superfamily; Hap43-induced gene; alkaline upregulated by Rim101; possibly an essential gene, disruptants not obtained by UAU1 method
Chr3x3 (AAB); Chr4x3 (AAB); ChrRx3 (AAB)	orf19.3074	Ca21chr4_C_albicans_SC5314	1597463	A	G	synonymous_variant	Asp178Asp	orf19.3074	Member of a family of telomere-proximal genes of unknown function
Chr1x3 (ABB); Chr2x3 (AAB); Chr5x1 (B); Chr6x3 (ABB); ChrRx3 (AAB)	orf19.310	Ca21chr3_C_albicans_SC5314	666416	A	G	synonymous_variant	Val286Val	orf19.310	Putative mitochondrial protein with a predicted role in cell wall biogenesis; possibly an essential gene, disruptants not obtained by UAU1 method
Chr1x3 (AAB); Chr7x3 (ABB)	orf19.382	Ca21chr1_C_albicans_SC5314	1843469	G	A	synonymous_variant	Lys288Lys	orf19.382	Translation elongation factor 1-alpha; genes encoding ribosomal subunits, translation factors, and tRNA synthetases are downregulated upon phagocytosis by murine macrophage
Chr3x3 (ABB)	orf19.3912	Ca21chr5_C_albicans_SC5314	948434	A	T	synonymous_variant	Thr488Thr	orf19.3912	GATA transcription factor, involved in regulation of nitrogen starvation-induced filamentous growth; regulates transcription of Mep2 ammonium permease; regulated by Gcn2 and Gcn4; mRNA binds She3; Spider biofilm induced
Chr4x3 (ABB)	orf19.3980	Ca21chr5_C_albicans_SC5314	1069967	T	C	synonymous_variant	Pro1251Pro	orf19.3980	Protein of unknown function
Chr4x3 (AAB)	orf19.4054	Ca21chr5_C_albicans_SC5314	1182903	A	G	synonymous_variant	Leu9Leu	orf19.4054	Putative transcription factor; positive regulator of gene expression; Efg1-repressed; member of a family of telomere-proximal genes; transcript upregulated in RHE model of oral candidiasis
Chr2x3 (ABB)	orf19.4482	Ca21chr1_C_albicans_SC5314	854881	G	A	synonymous_variant	Ser288Ser	orf19.4482	Protein of unknown function; constitutive expression independent of MTL or white-opaque status
Chr6x3 (ABB); Chr7x3 (ABB)	orf19.4686	Ca21chr4_C_albicans_SC5314	205376	T	C	synonymous_variant	Leu221Leu	orf19.4686	Protein of unknown function
Chr1x3 (AAB); Chr1x3 (ABB); Chr7x3 (AAB)	orf19.5290	Ca21chr4_C_albicans_SC5314	897645	T	C	synonymous_variant	Gln299Gln	orf19.5290	Protein of unknown function; repressed by Sfu1; Hap43-induced gene
Chr7x3 (AAB)	orf19.5657	Ca21chr4_C_albicans_SC5314	47732	T	C	synonymous_variant	Gln123Gln	orf19.5657	Protein involved in transcription regulation; ortholog of S. cerevisiae Swi1p, which is a subunit of the SWI/SNF chromatin remodeling complex; interacts with Snf2p; SWI/SNF complex is essential for hyphal growth and virulence
Chr4x3 (ABB)	orf19.5741	Ca21chr6_C_albicans_SC5314	792416	C	T	synonymous_variant	Tyr315Tyr	orf19.5741	Cell-surface adhesin; adhesion, virulence, immunoprotective roles; band at hyphal base; Rfg1, Ssk1, Spider biofilm induced; flow model biofilm repressed; CAI-4 strain background effects; promoter bound Bcr1, Tec1, Efg1, Ndt80, and Brg1
Chr1x3 (ABB); Chr2x4 (AABB)	orf19.5742	Ca21chr6_C_albicans_SC5314	800635	C	T	synonymous_variant	Thr871Thr	orf19.5742	ALS family cell-surface glycoprotein; expressed during infection of human epithelial cells; confers laminin adhesion to S. cerevisiae; highly variable; putative GPI-anchor; Hap43-repressed
Chr4x3 (AAB); Chr5x4 (AABB); Chr7x3 (ABB); ChrRx3 (AAB); ChrRx3 (ABB)	orf19.5809	Ca21chr2_C_albicans_SC5314	588941	C	T	synonymous_variant	His235His	orf19.5809	Putative arylformamidase, enzyme of the NAD biosynthesis pathway; Gcn4p-regulated
Chr2x4 (AABB)	orf19.5826	Ca21chr2_C_albicans_SC5314	558255	G	A	synonymous_variant	Gly153Gly	orf19.5826	Predicted amino acid transmembrane transporter; rat catheter biofilm repressed
Chr7x3 (ABB)	orf19.6418	Ca21chrR_C_albicans_SC5314	1835554	C	A	synonymous_variant	Ile111Ile	orf19.6418	Protein of unknown function
Chr2x3 (ABB)	orf19.6484	Ca21chr7_C_albicans_SC5314	495960	T	A	synonymous_variant	Ala118Ala	orf19.6484	Protein of unknown function
Chr1x3 (AAB); Chr1x3 (ABB); Chr2x3 (AAB); Chr2x3 (ABB); Chr4x3 (AAB); Chr4x3 (ABB); Chr5x1 (B); Chr5x4 (AABB); Chr6x3 (AAB); ChrRx3 (AAB)	orf19.654	Ca21chrR_C_albicans_SC5314	1080289	G	A	synonymous_variant	Val173Val	orf19.654	Predicted protein only found in C. albicans and C. dubliniensis; highly induced during chlamydospore development
Chr4x3 (ABB)	orf19.6877	Ca21chr2_C_albicans_SC5314	1158444	T	C	synonymous_variant	Pro444Pro	orf19.6877	Putative peptide:N-glycanase; gene has variable numbers of 12-bp repeats; induced by caspofungin, ciclopirox olamine, ketoconazole or hypoxia; gene of core caspofungin response; Hap43-induced; Spider biofilm induced
Chr1x3 (AAB); Chr1x3 (ABB); ChrRx3 (AAB)	orf19.730	Ca21chrR_C_albicans_SC5314	1567454	T	C	synonymous_variant	Cys388Cys	orf19.730	Protein of unknown function
Chr1x3 (ABB)	orf19.856	Ca21chr2_C_albicans_SC5314	767346	T	A	synonymous_variant	Ala232Ala	orf19.856	Putative thiol-specific monooxygenase; mutant is viable; flow model biofilm induced
Chr1x3 (ABB); Chr2x3 (AAB); Chr5x1 (A)	orf19.857	Ca21chr2_C_albicans_SC5314	763950	T	C	synonymous_variant	Asn150Asn	orf19.857	Protein with a monooxygenase domain; Spider biofilm induced
Chr1x3 (ABB)	tV(AAC)6	Ca21chr3_C_albicans_SC5314	1232694	T	C	synonymous_variant	Arg23Arg	tV(AAC)6	tRNA-Val, predicted by tRNAscan-SE; AAC anticodon
Chr5x1 (B)	tV(AAC)6	Ca21chr3_C_albicans_SC5314	1232694	T	C	synonymous_variant	Arg23Arg	tV(AAC)6	tRNA-Val, predicted by tRNAscan-SE; AAC anticodon
